# Supplementary material for: Design, synthesis, in vitro, and in silico studies of novel isatin-hybrid hydrazones as potential triple-negative breast cancer agents
Source: PubMed Central journal article supplement (PMC11726183; doi:10.1039/d4ra07650h), 2025-01-13

### **<sup>1</sup>HNMR, <sup>13</sup>CNMR and mass spectra of compound 5**

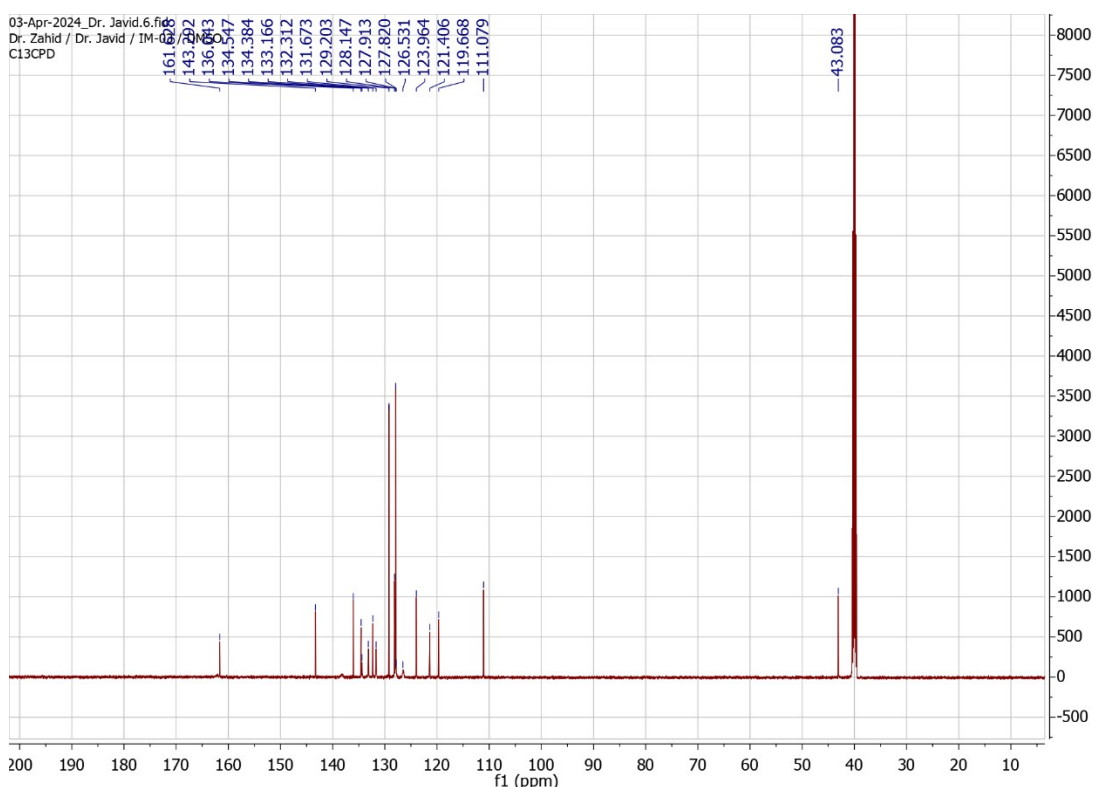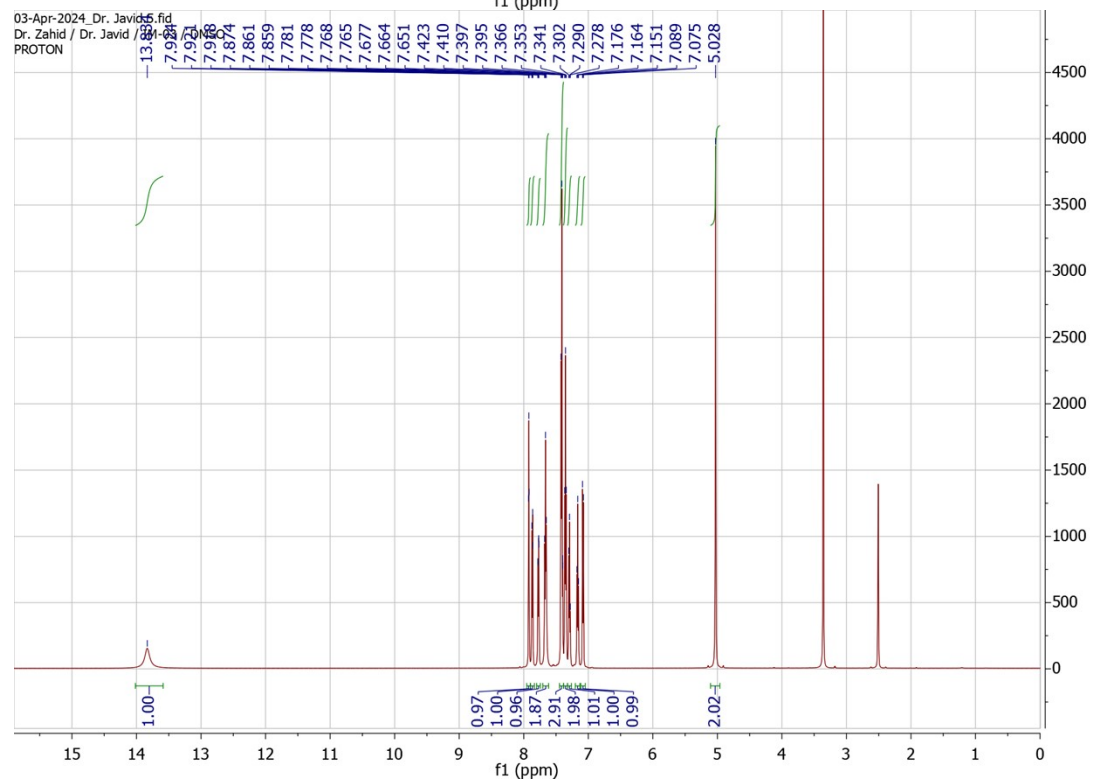

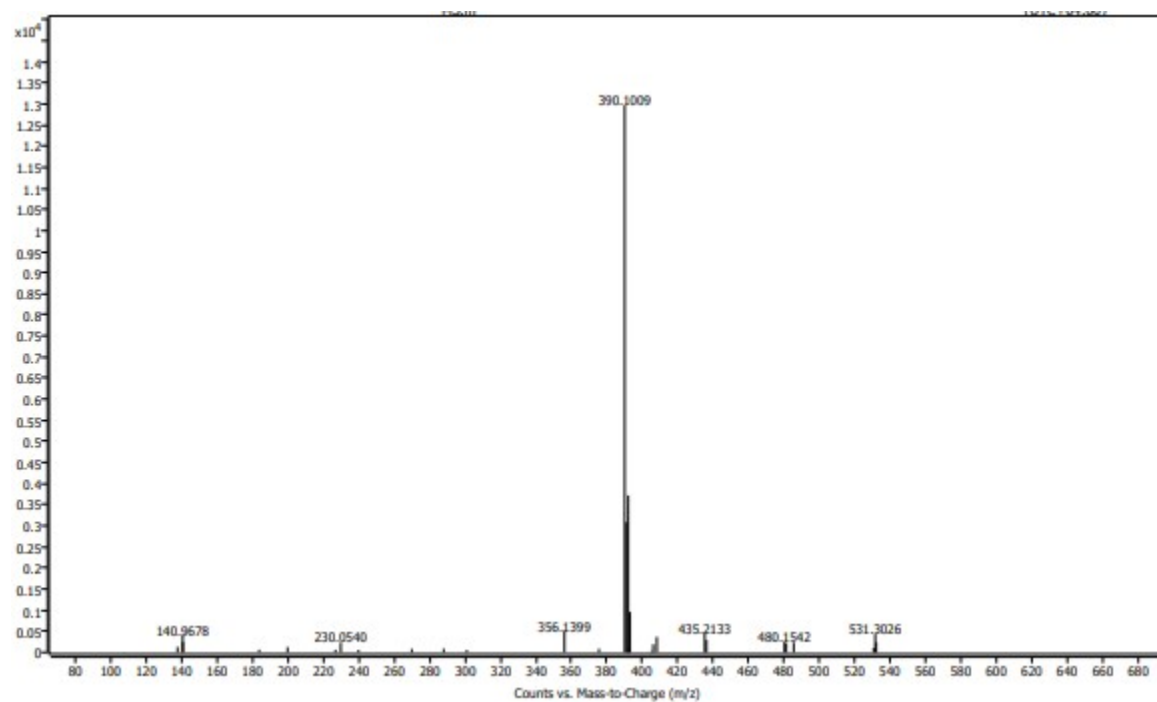

# <sup>1</sup>H NMR, <sup>13</sup>C NMR, and mass spectra of compound 6

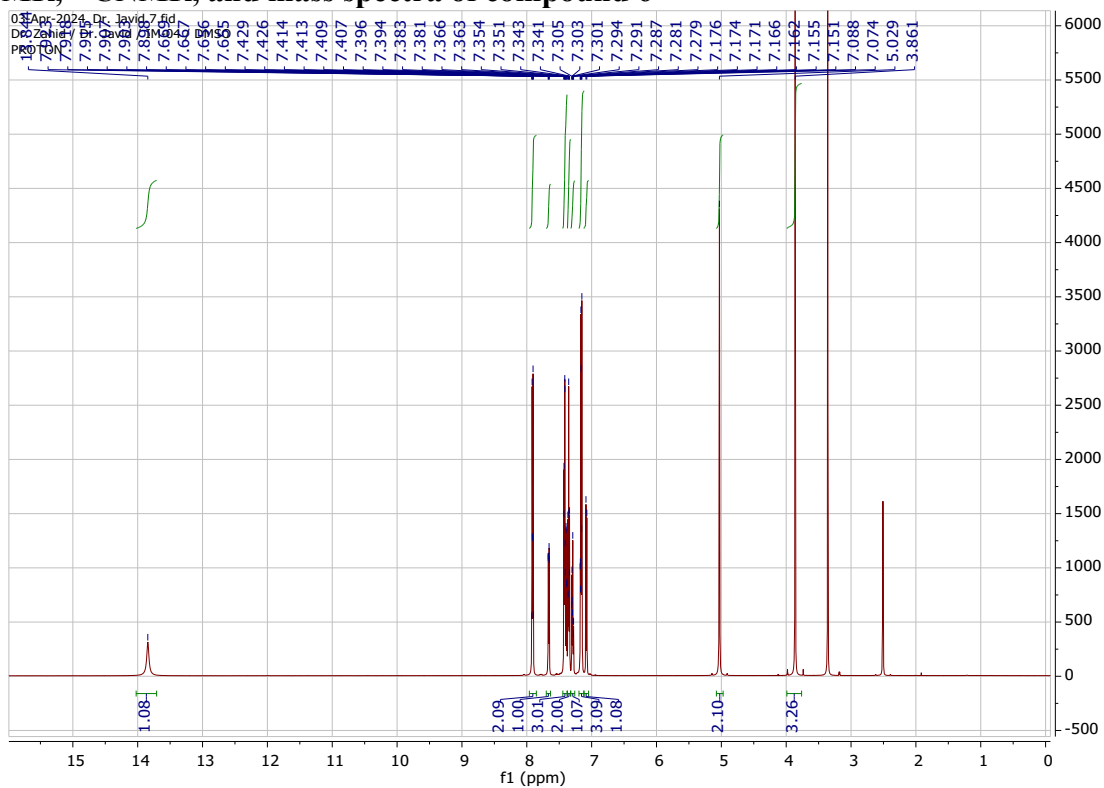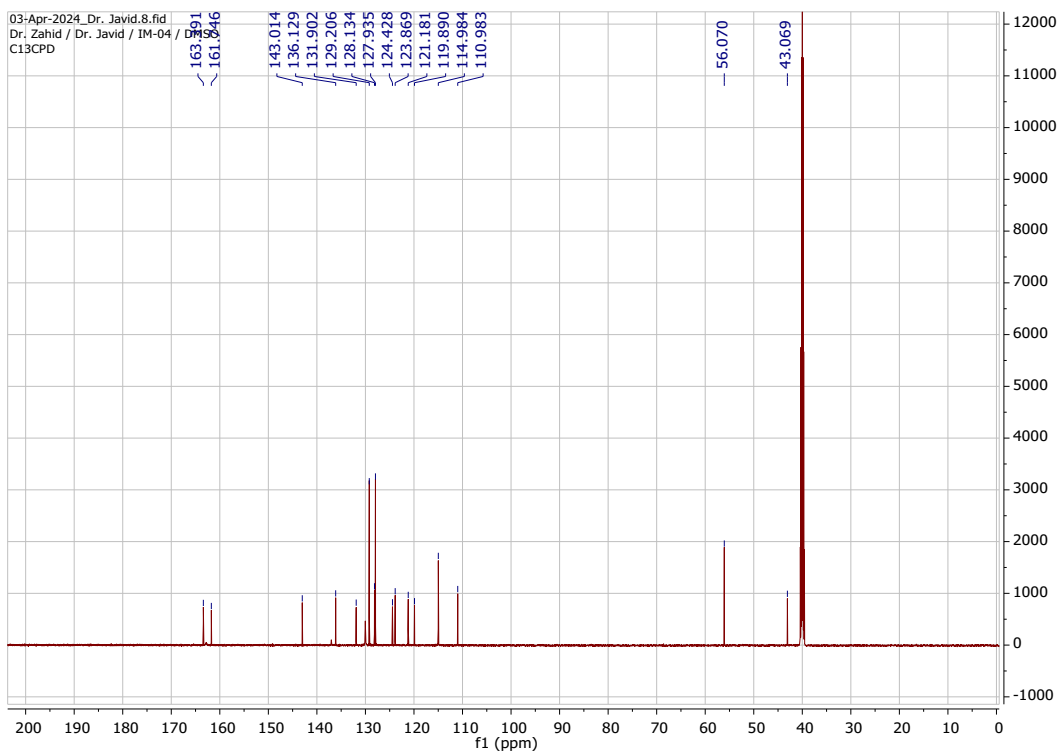

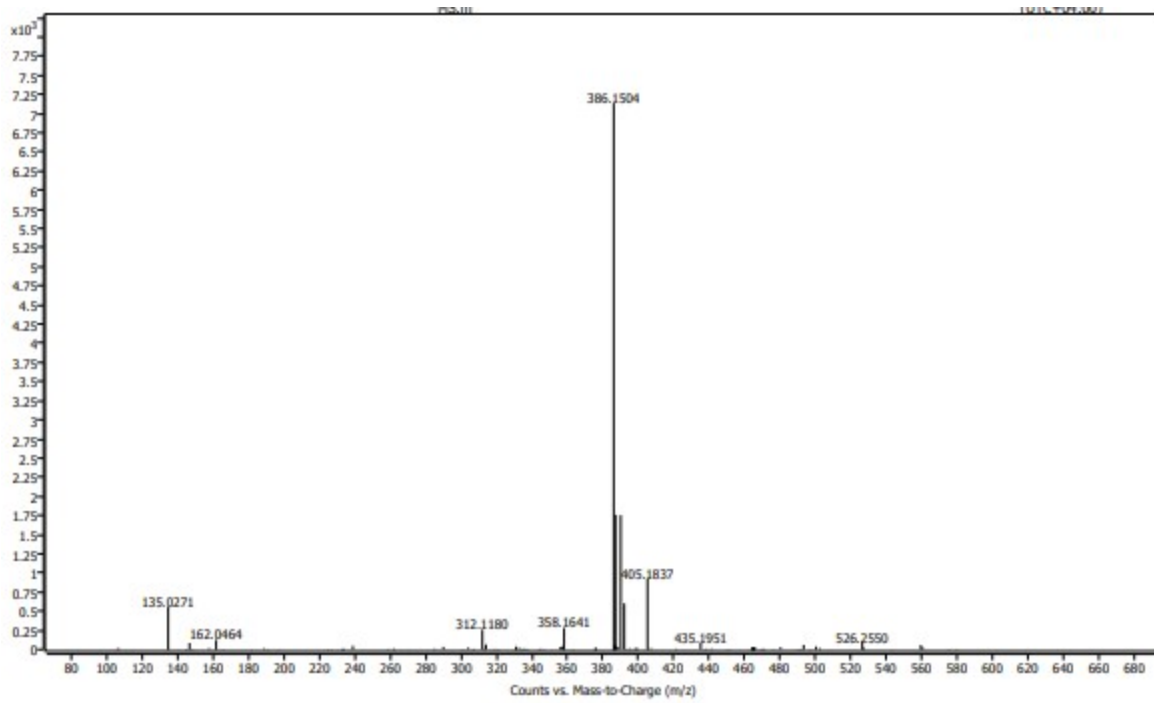



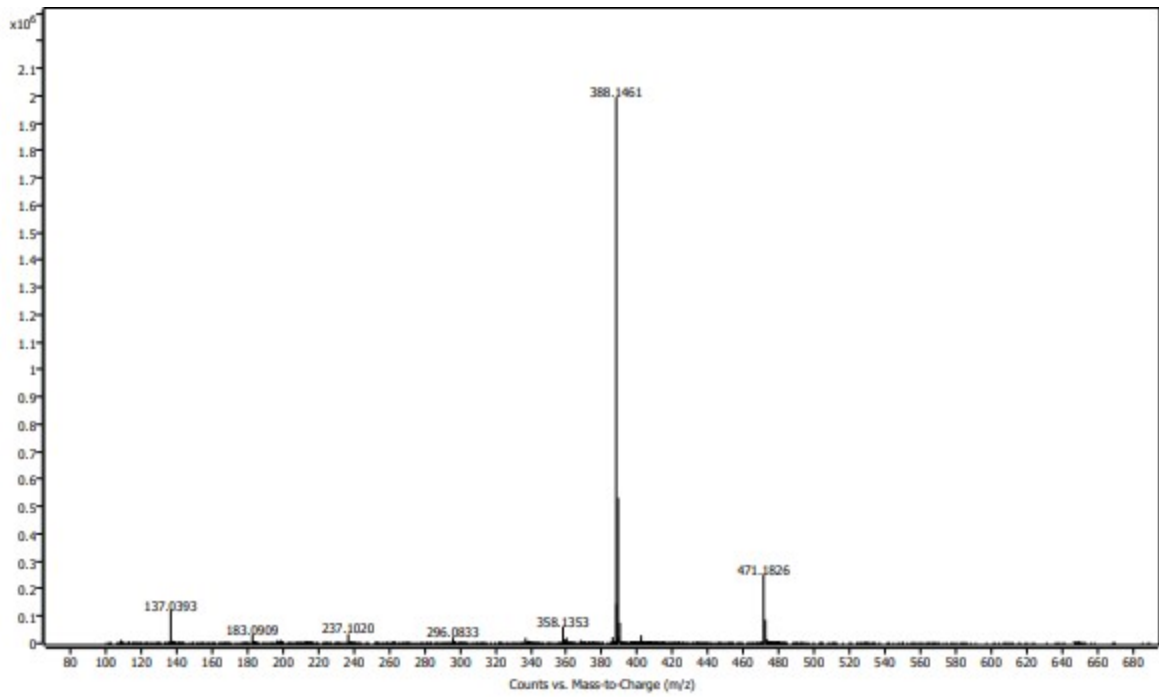

# <sup>1</sup>H NMR, <sup>13</sup>C NMR and mass spectra of compound 8

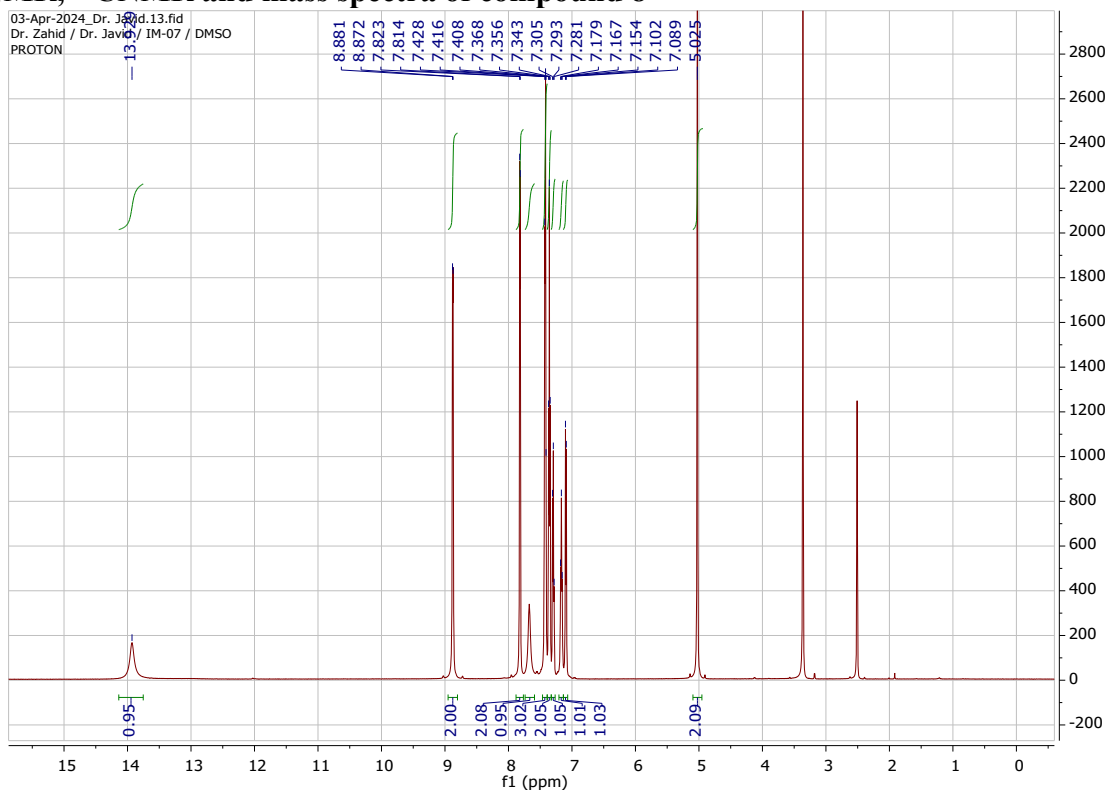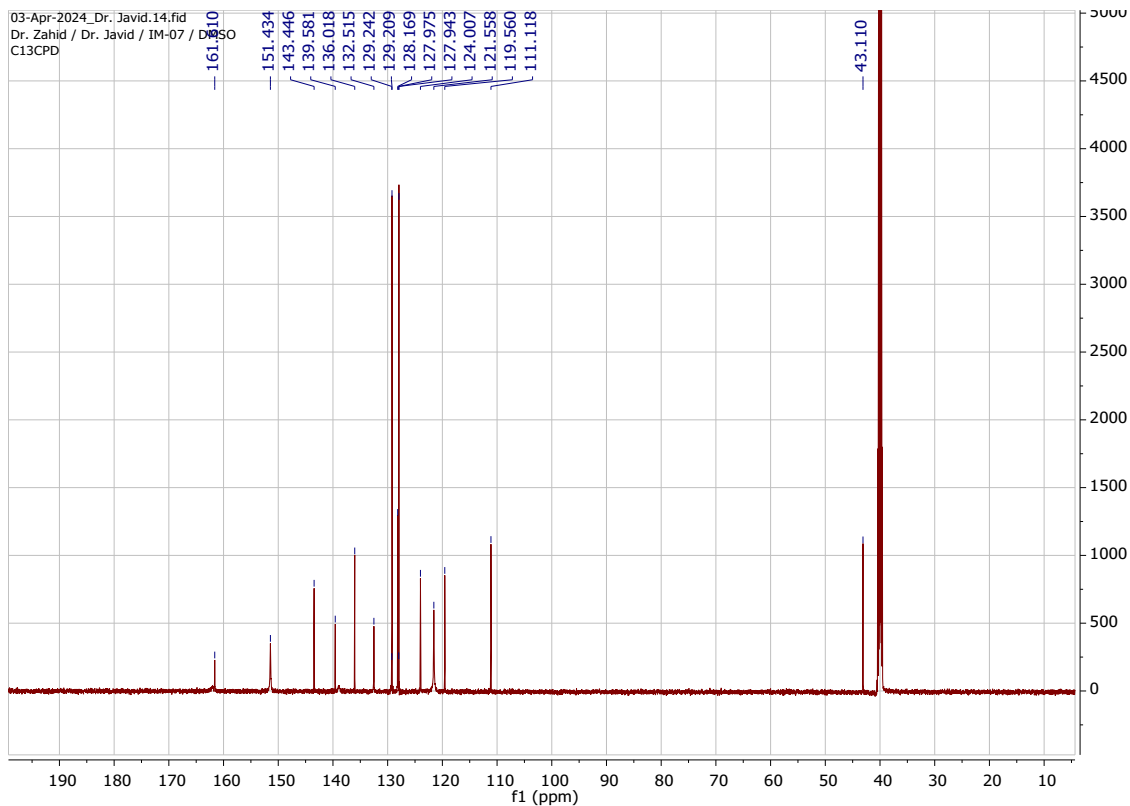

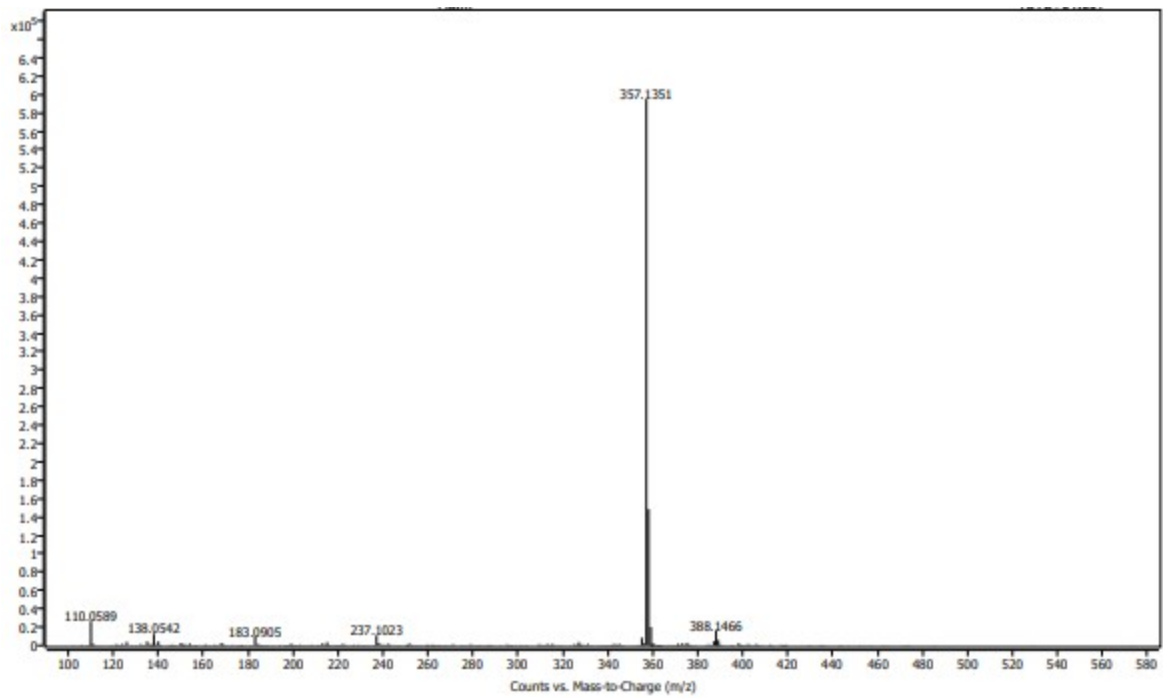





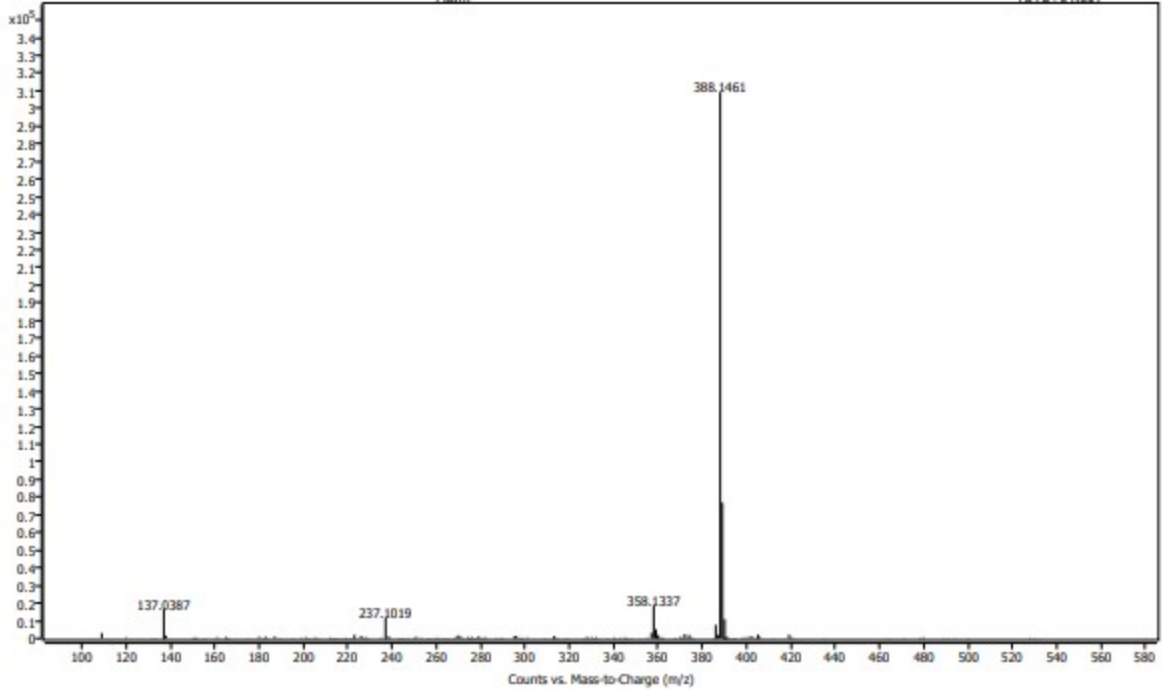

# <sup>1</sup>H NMR, <sup>13</sup>C NMR, and mass spectra of compound 10

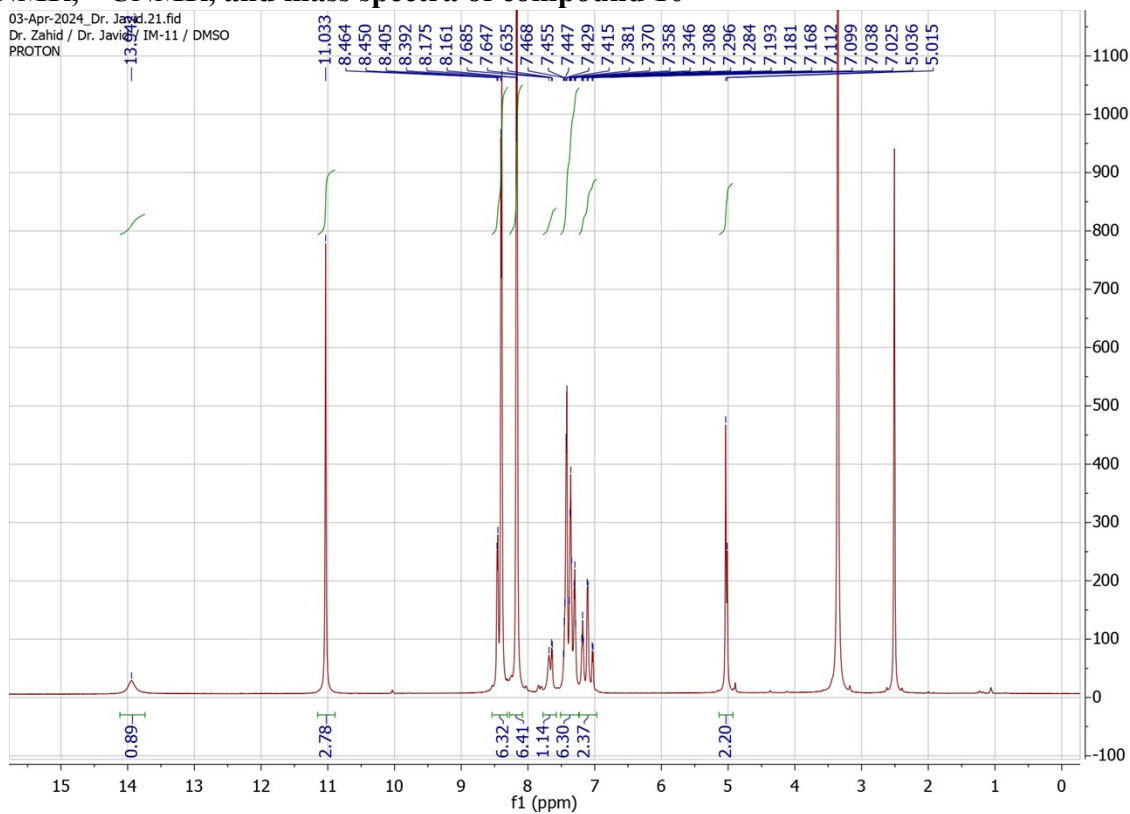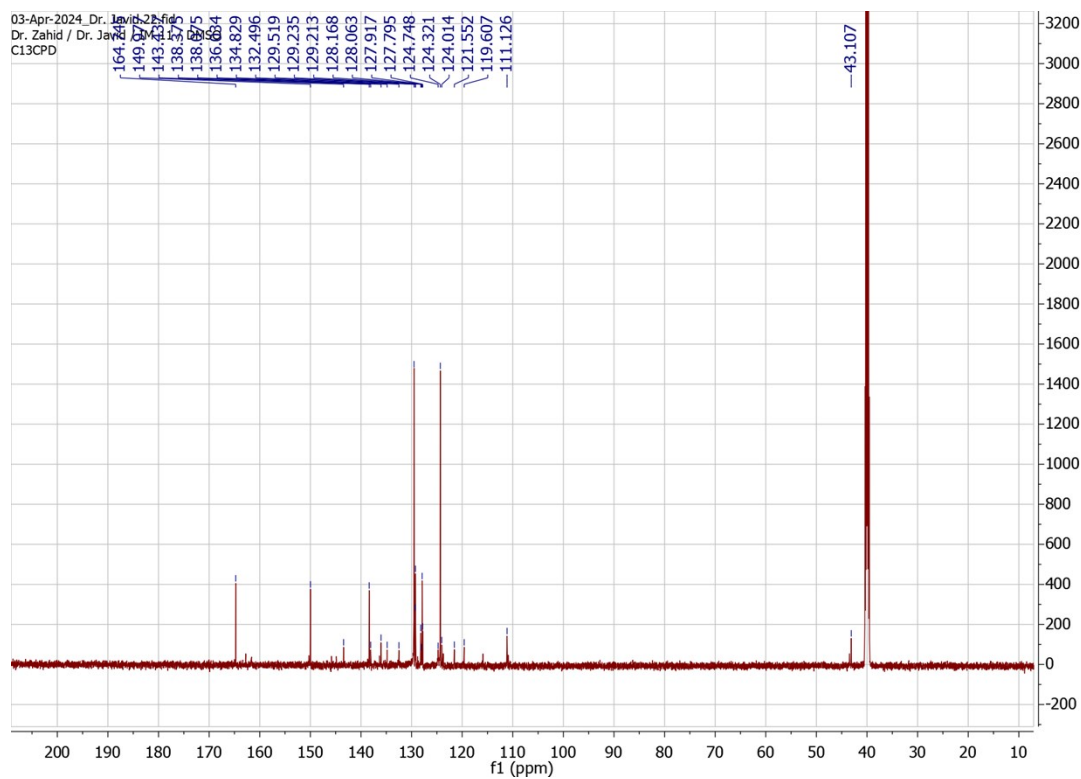

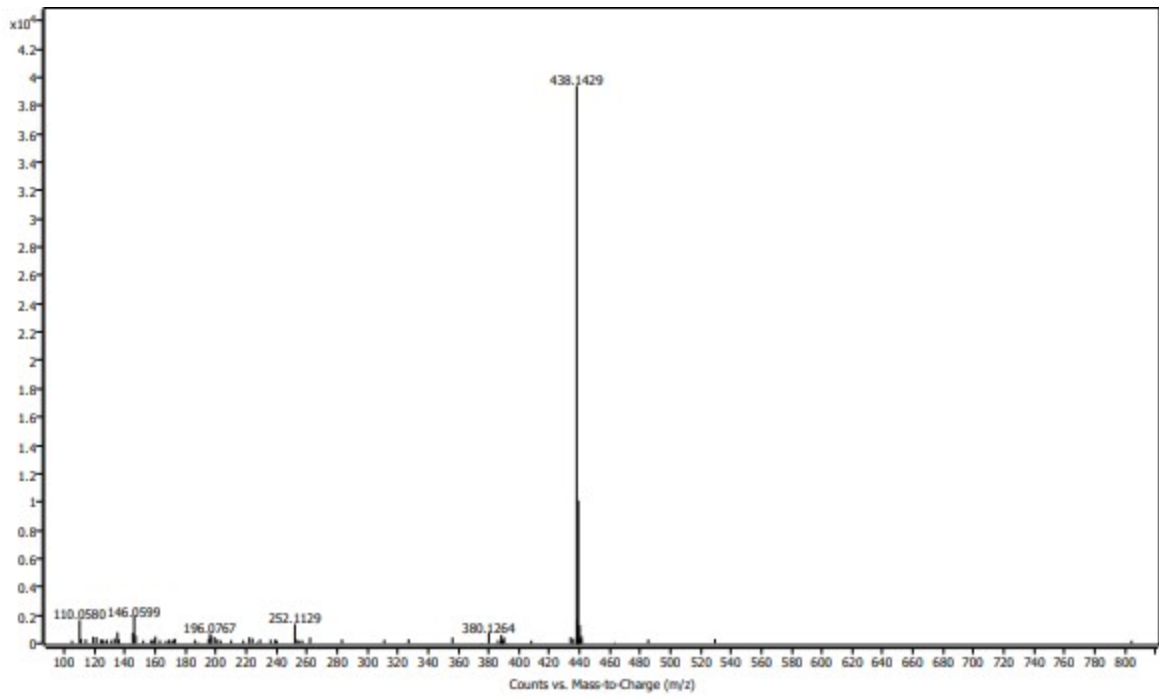

# <sup>1</sup>H NMR, <sup>13</sup>C NMR, and mass spectra of compound 11

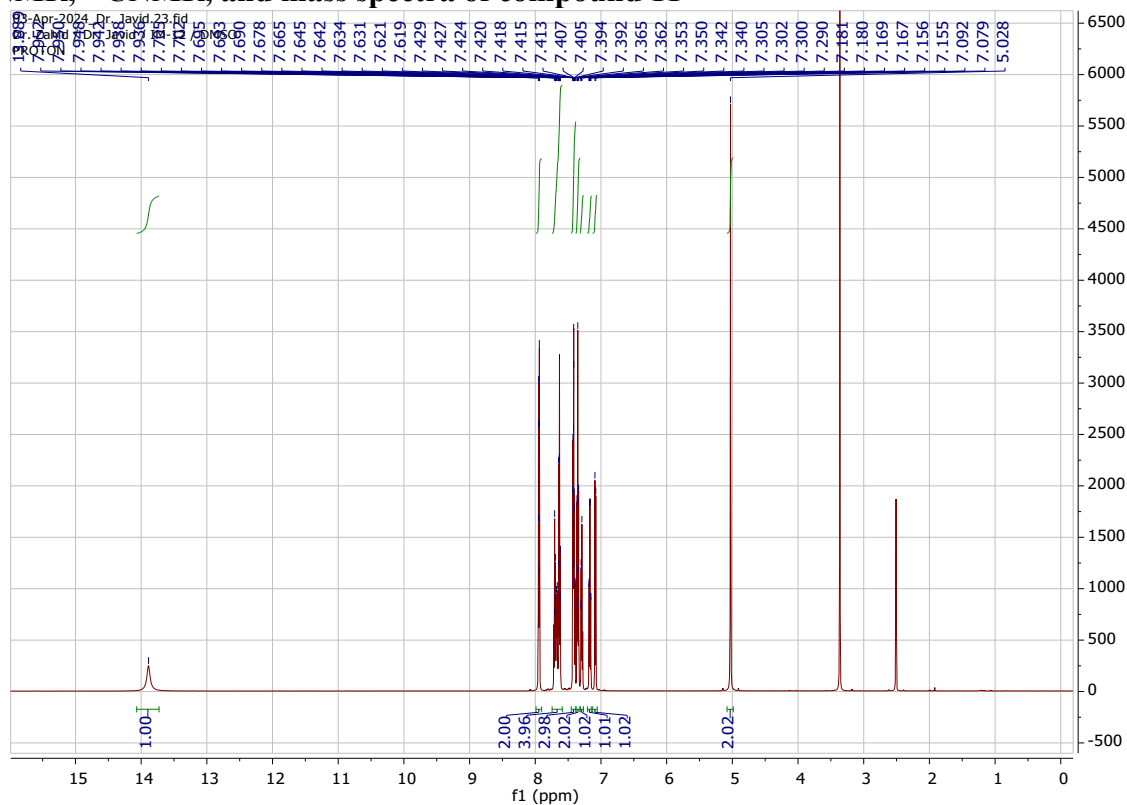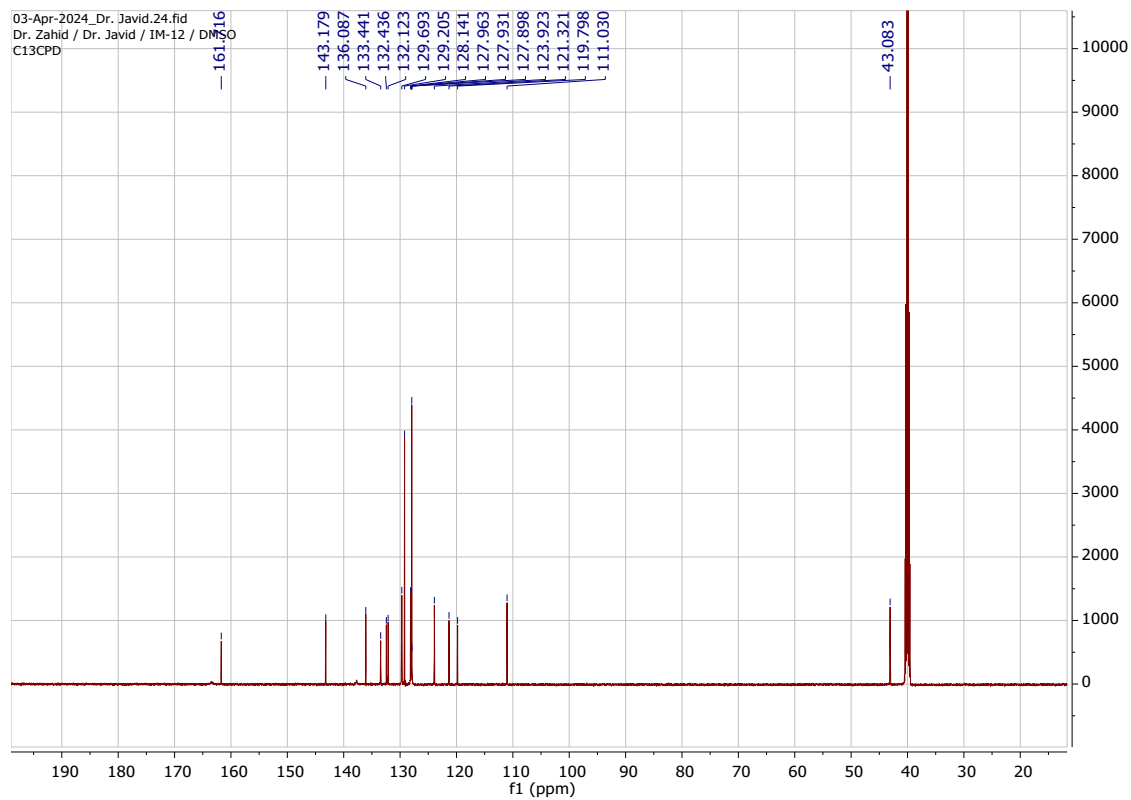

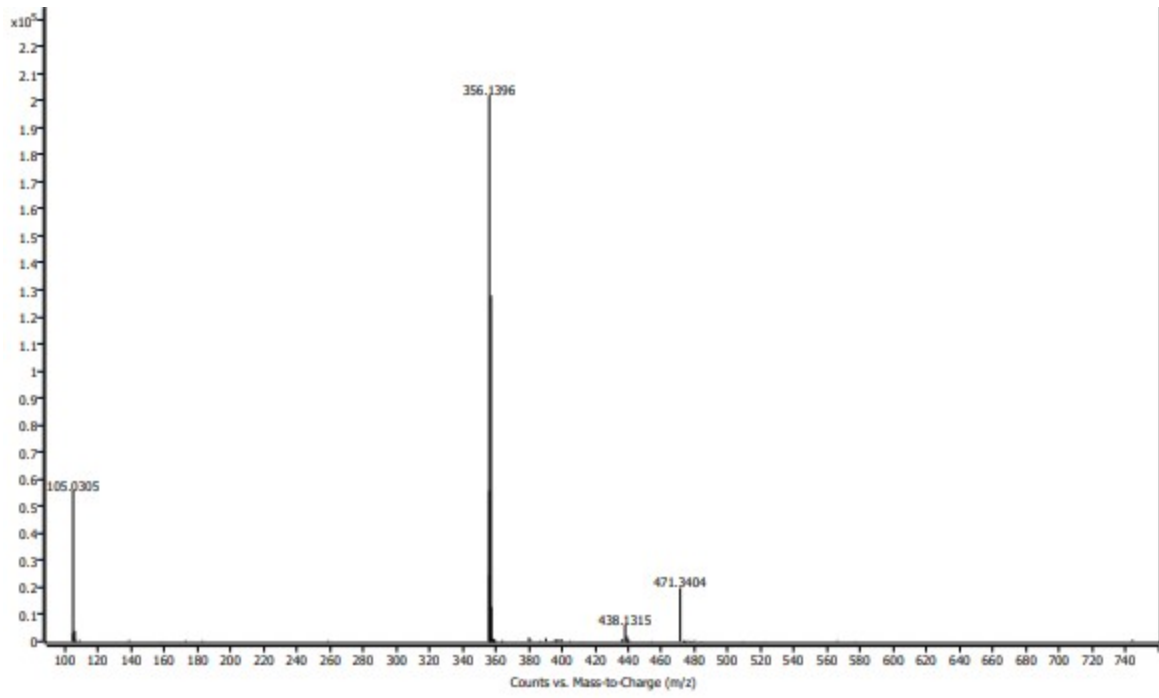

# <sup>1</sup>H NMR, <sup>13</sup>C NMR, and mass spectra of compound 12

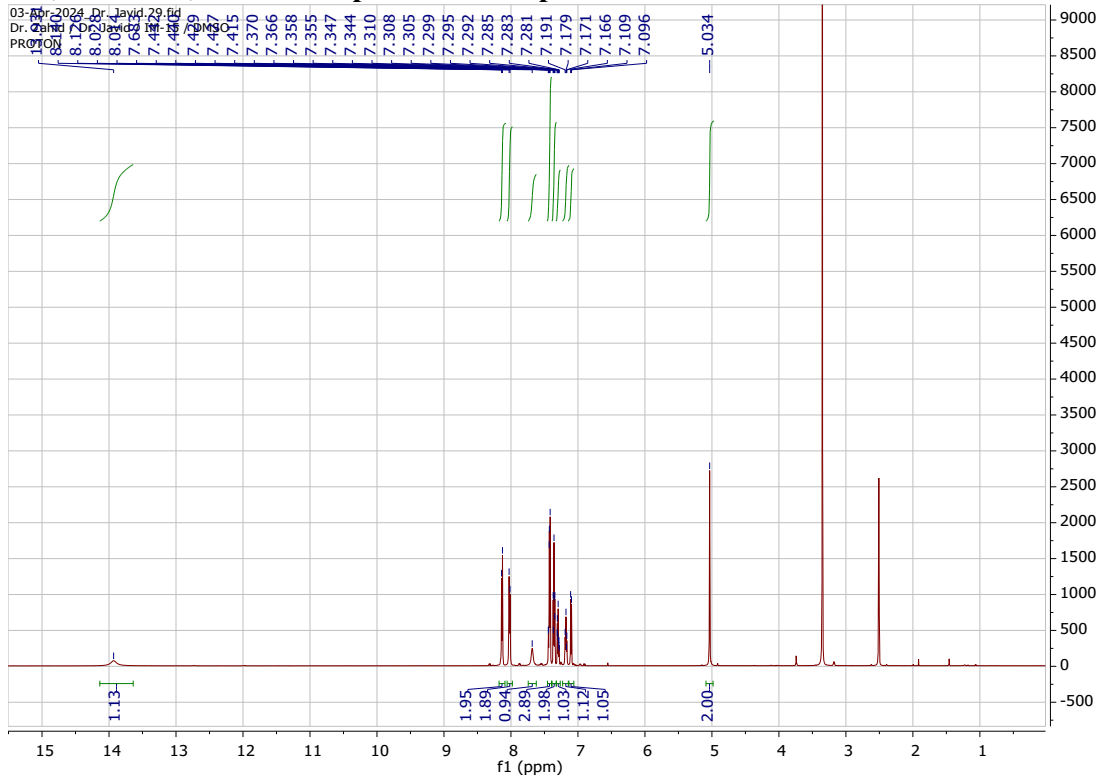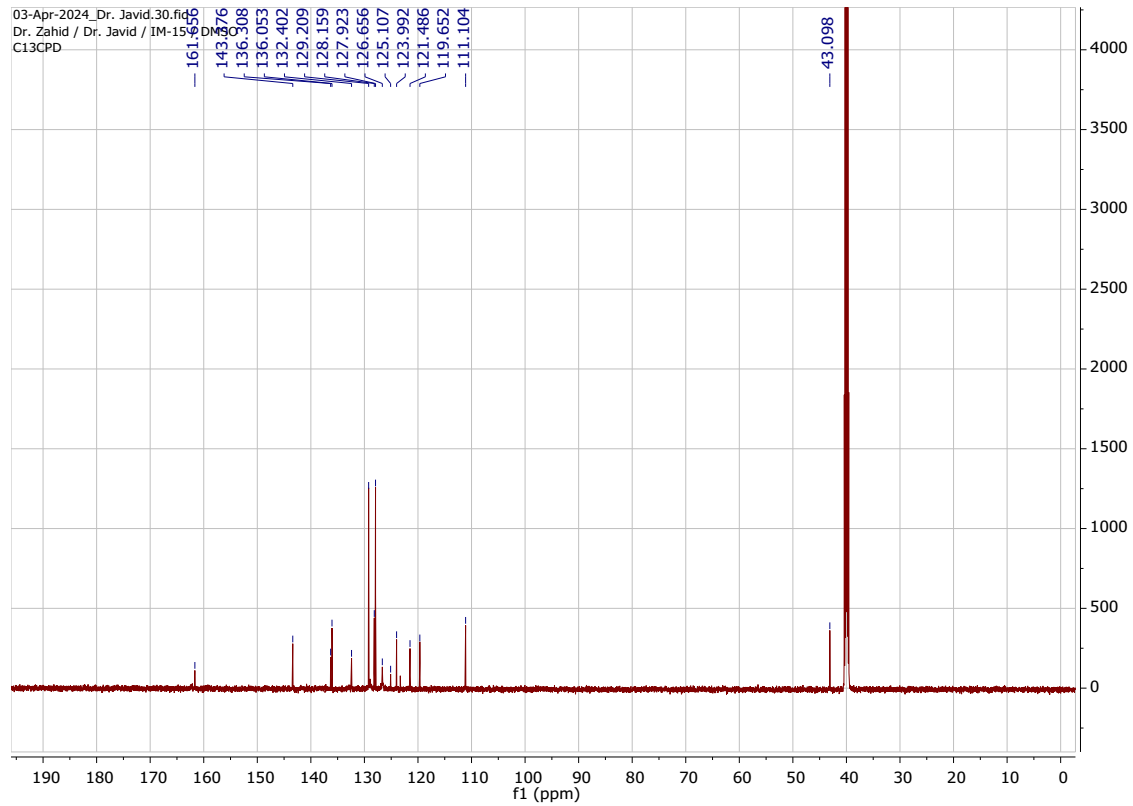

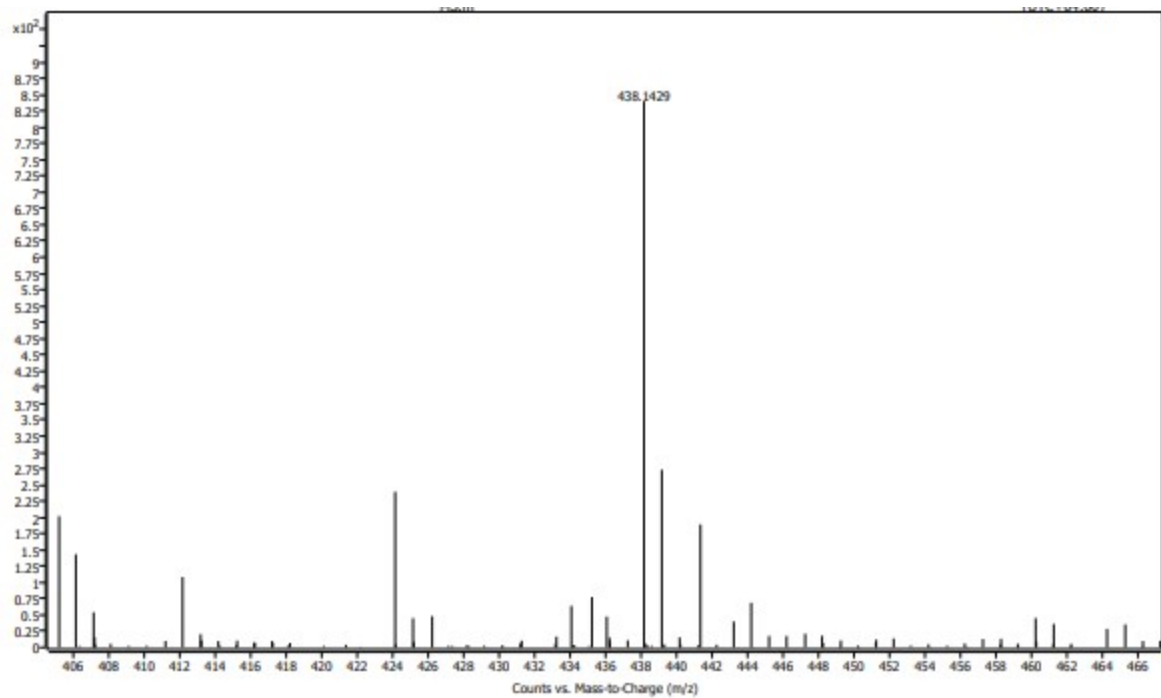



# <sup>1</sup>H NMR, <sup>13</sup>C NMR, and mass spectra of compound 13

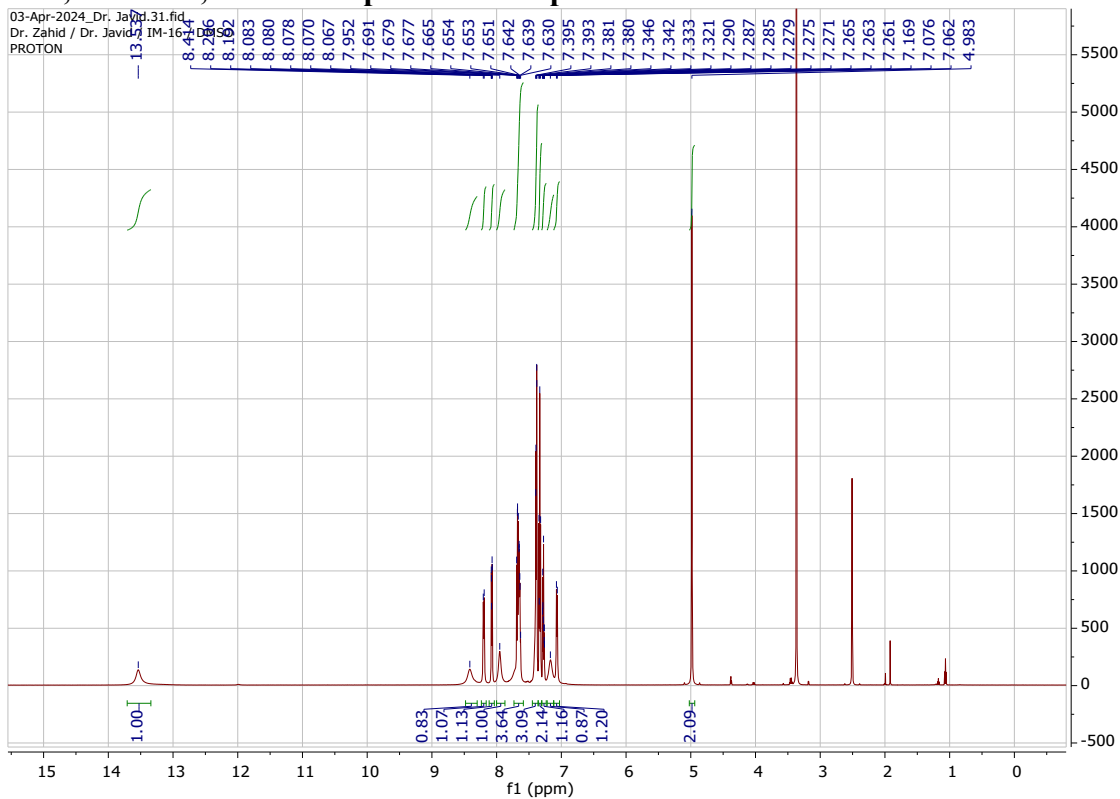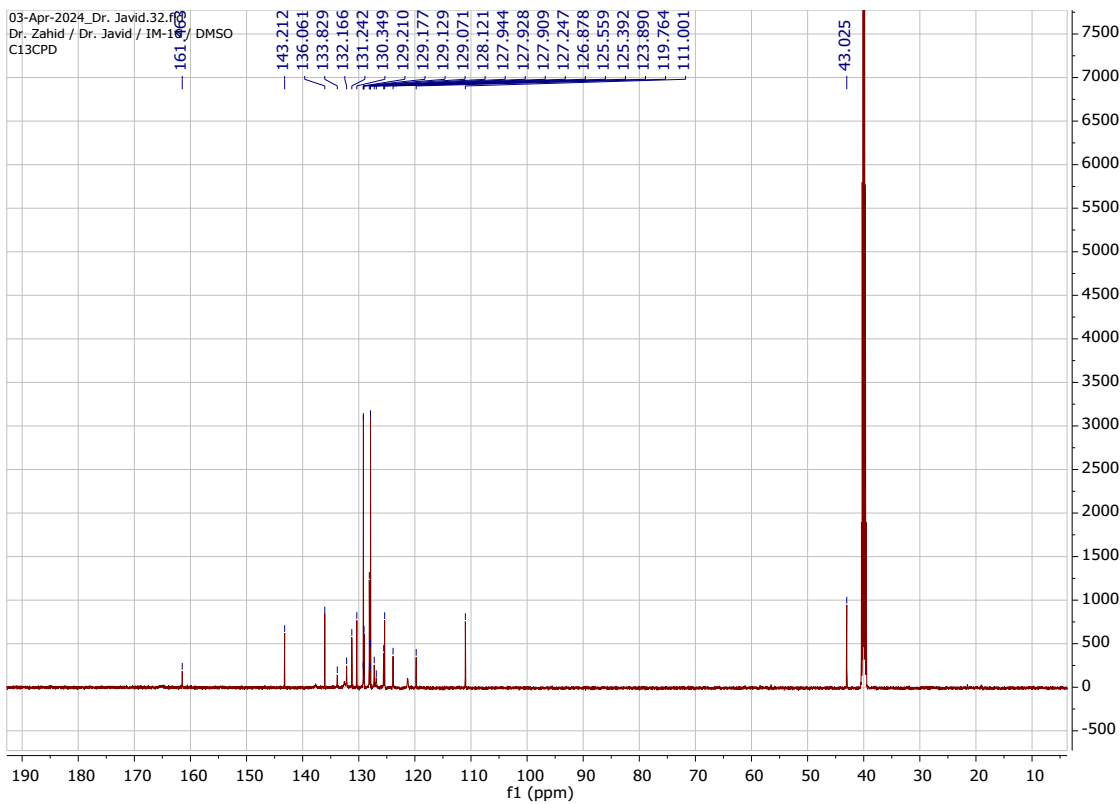

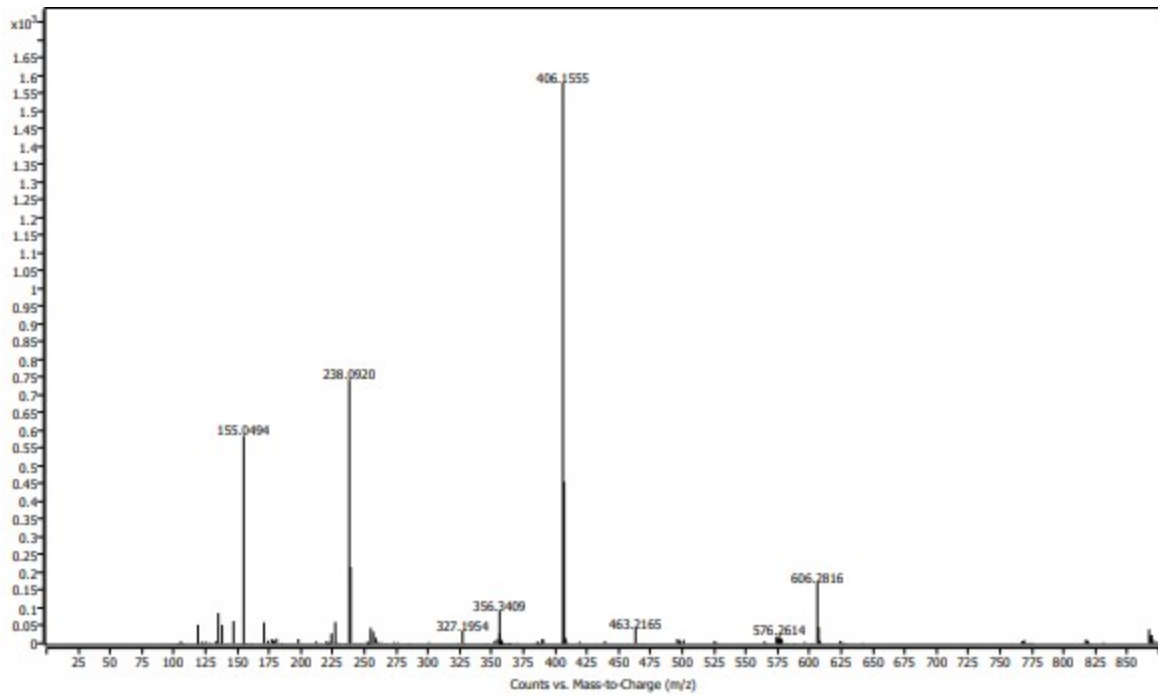

# <sup>1</sup>H NMR, <sup>13</sup>C NMR, and mass spectra of compound 14

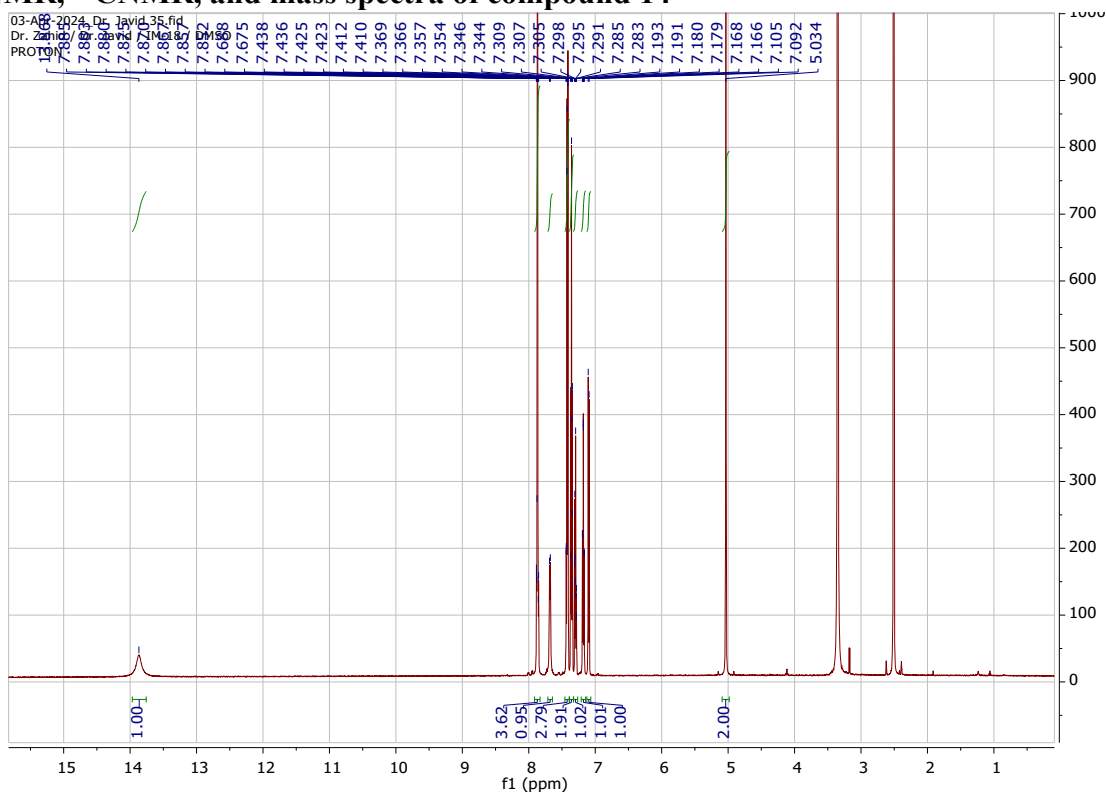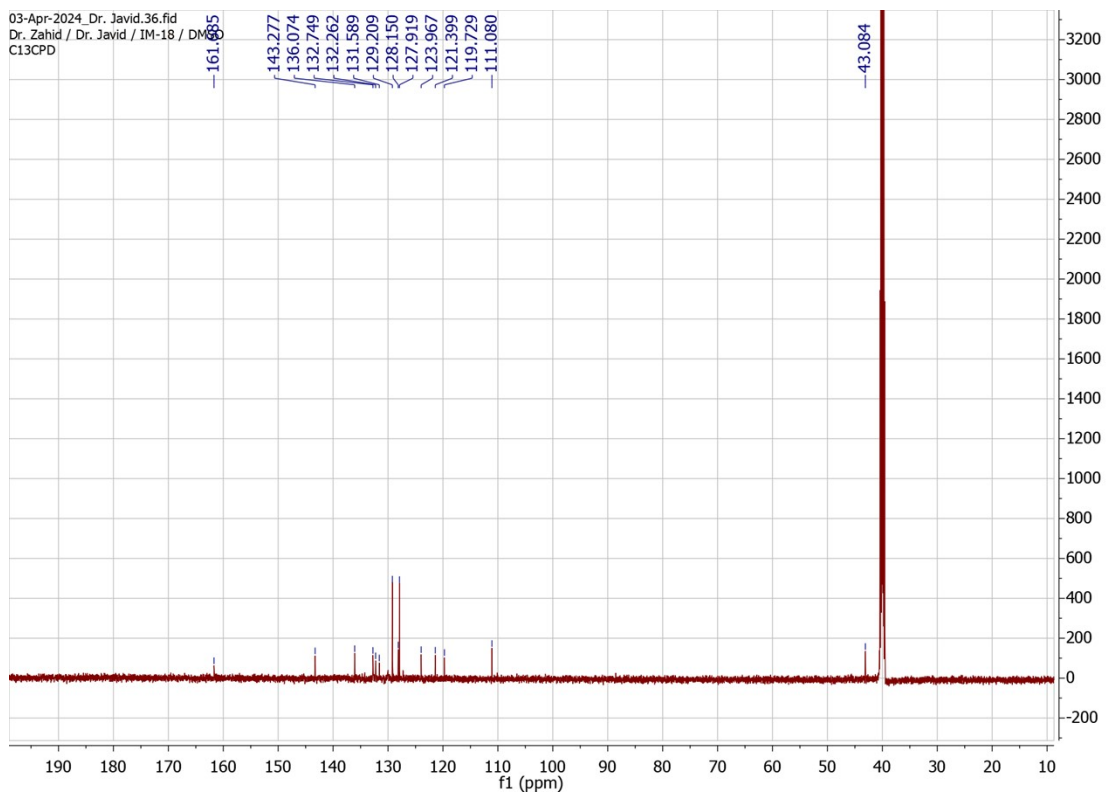

|              |         |                |                           |                 |                                     |
|--------------|---------|----------------|---------------------------|-----------------|-------------------------------------|
| Sample Name  | IM-18   | Rack Position  | Instrument                | Instrument 1    | Acq Operator                        |
| Inj Vol (ul) | 3       | Plate Position | IRM Status                | All ions missed |                                     |
| Data File    | IM-18.d | Acq Method     | APCI POS ION DMSO<br>MS.m |                 | Acq Time (Local)                    |
|              |         |                |                           |                 | 23-Sep-24 2:19:46 PM<br>(UTC+04:00) |

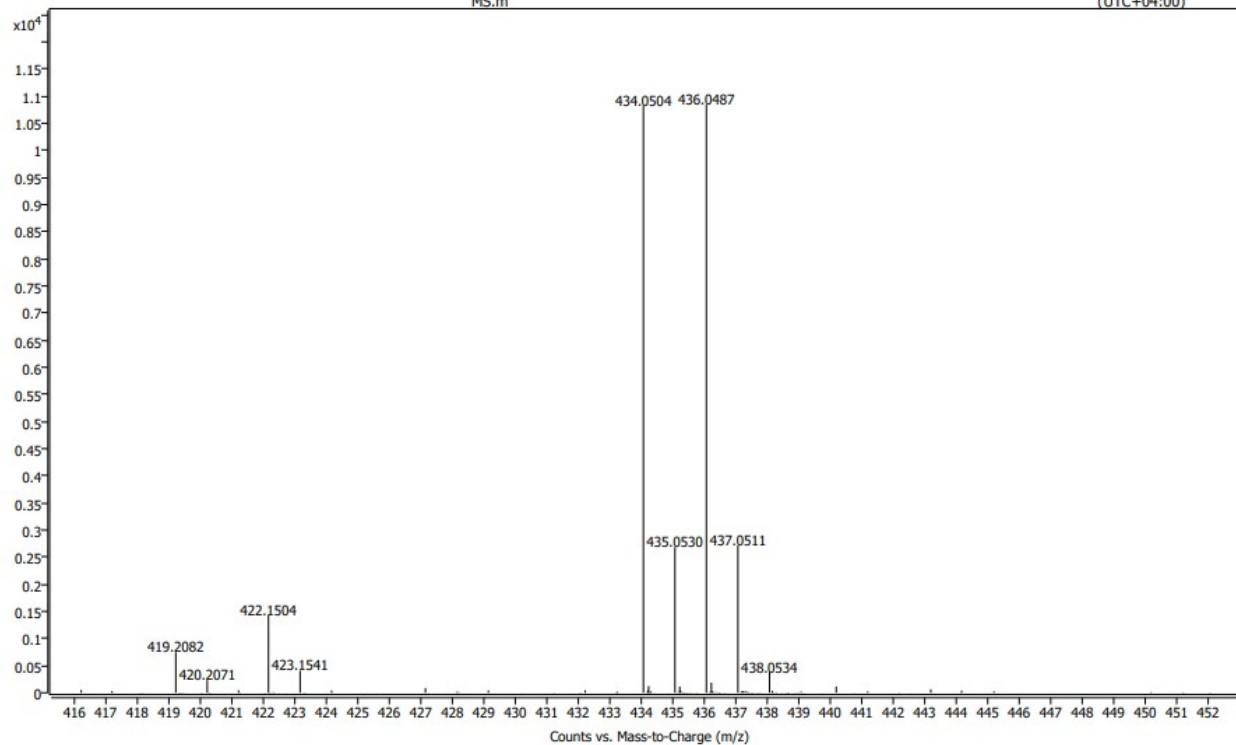

# <sup>1</sup>H NMR, <sup>13</sup>C NMR, and mass spectra of compound 15

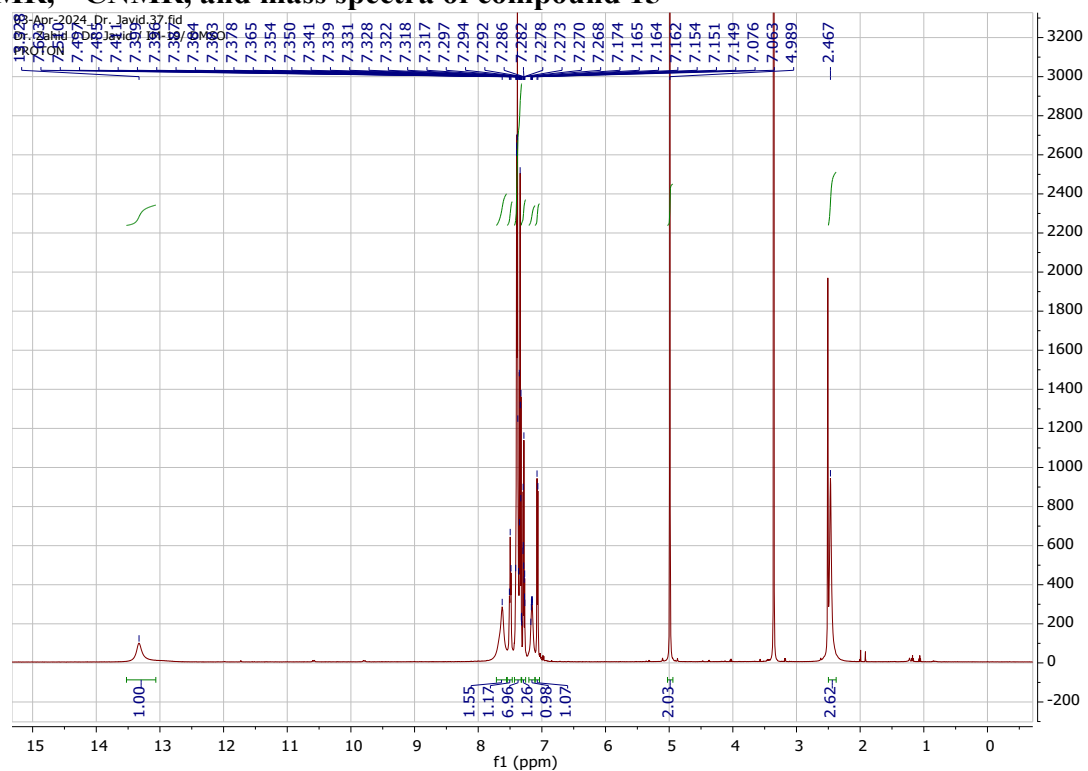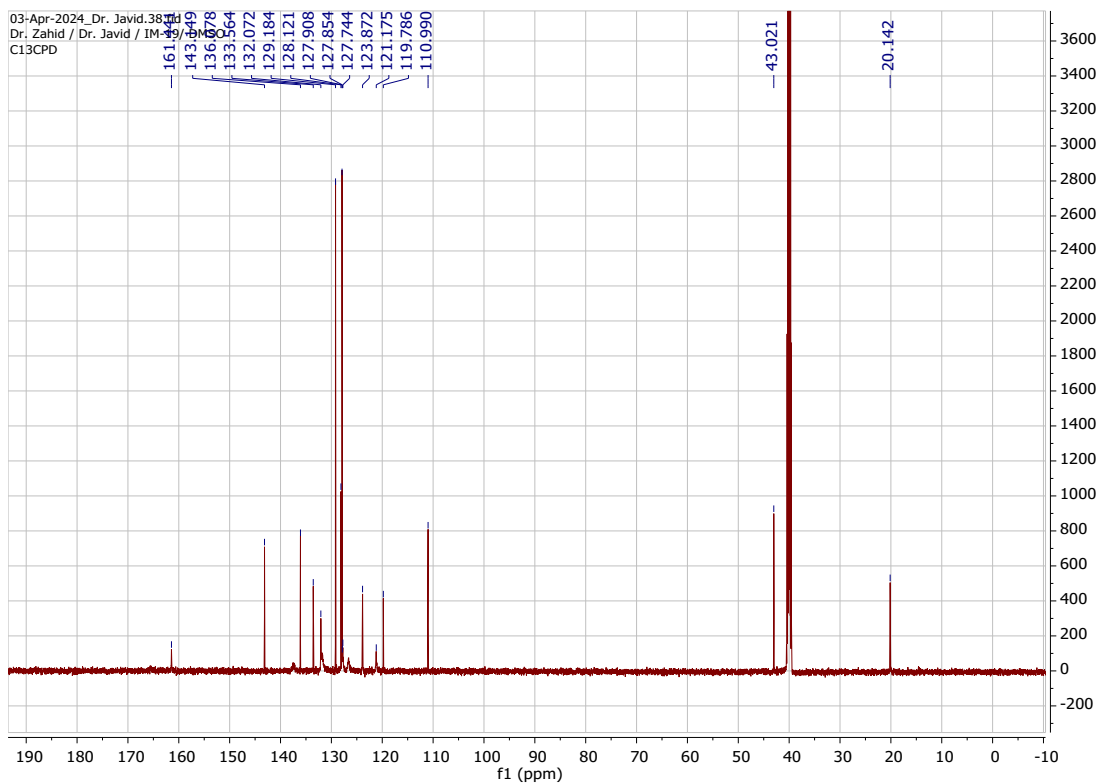

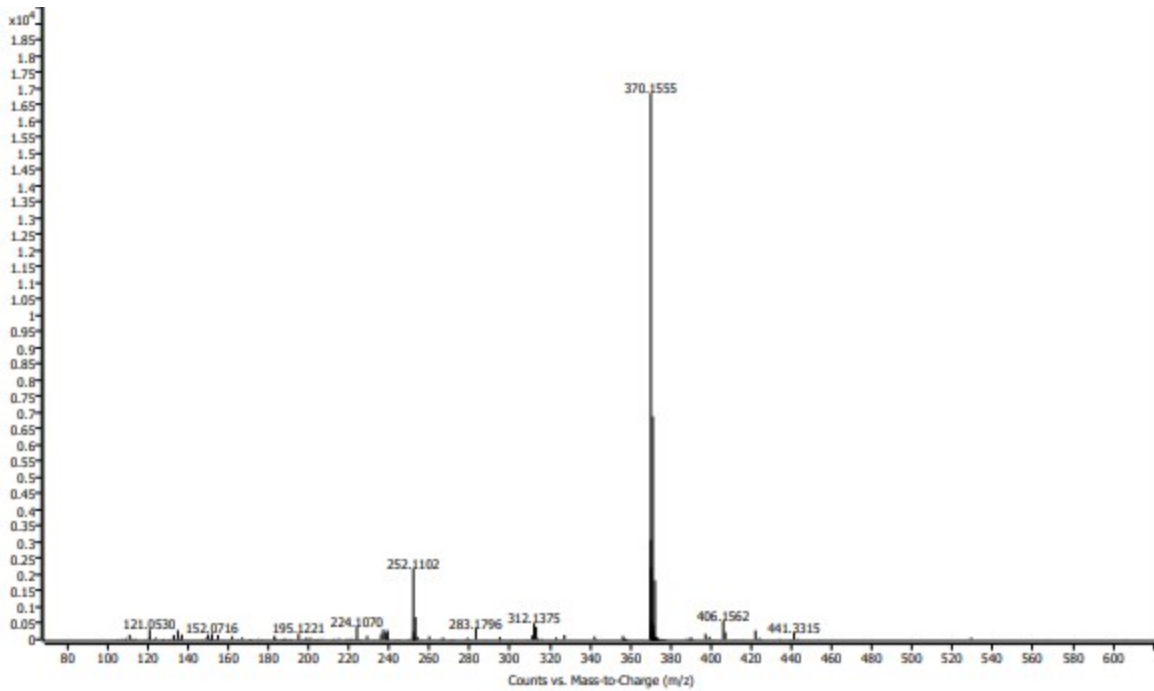

# <sup>1</sup>H NMR, <sup>13</sup>C NMR, and mass spectra of compound 16

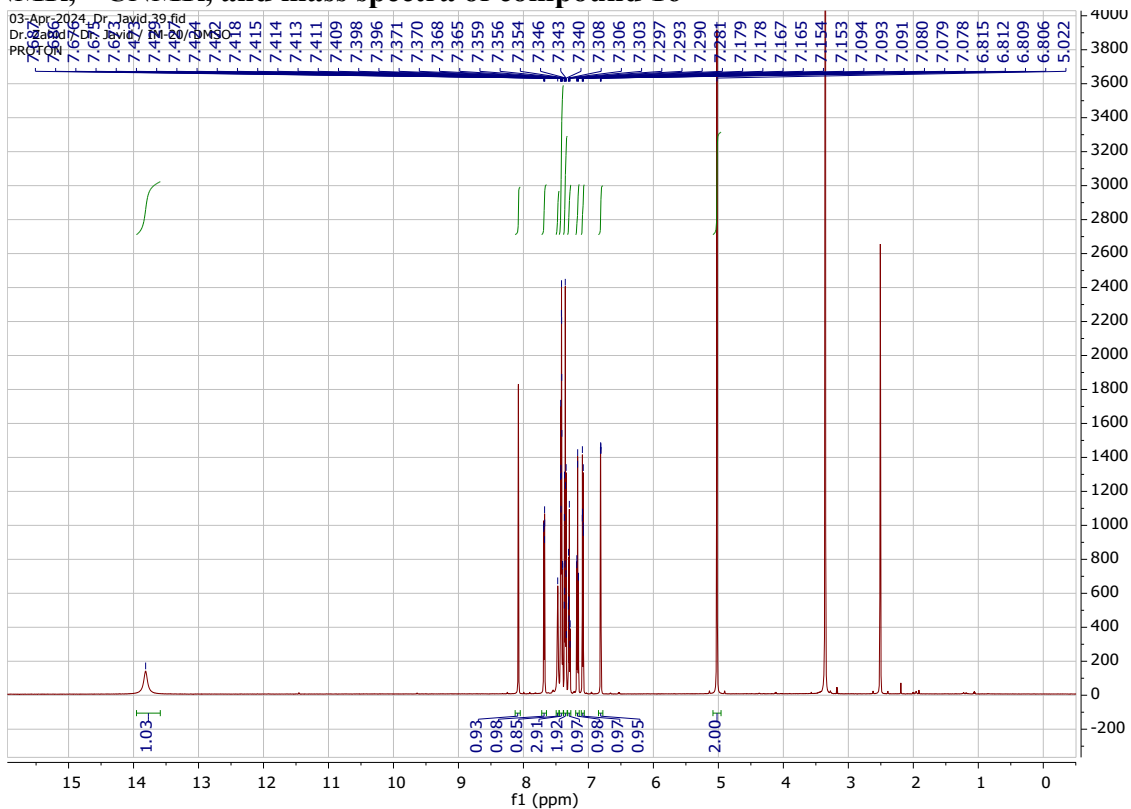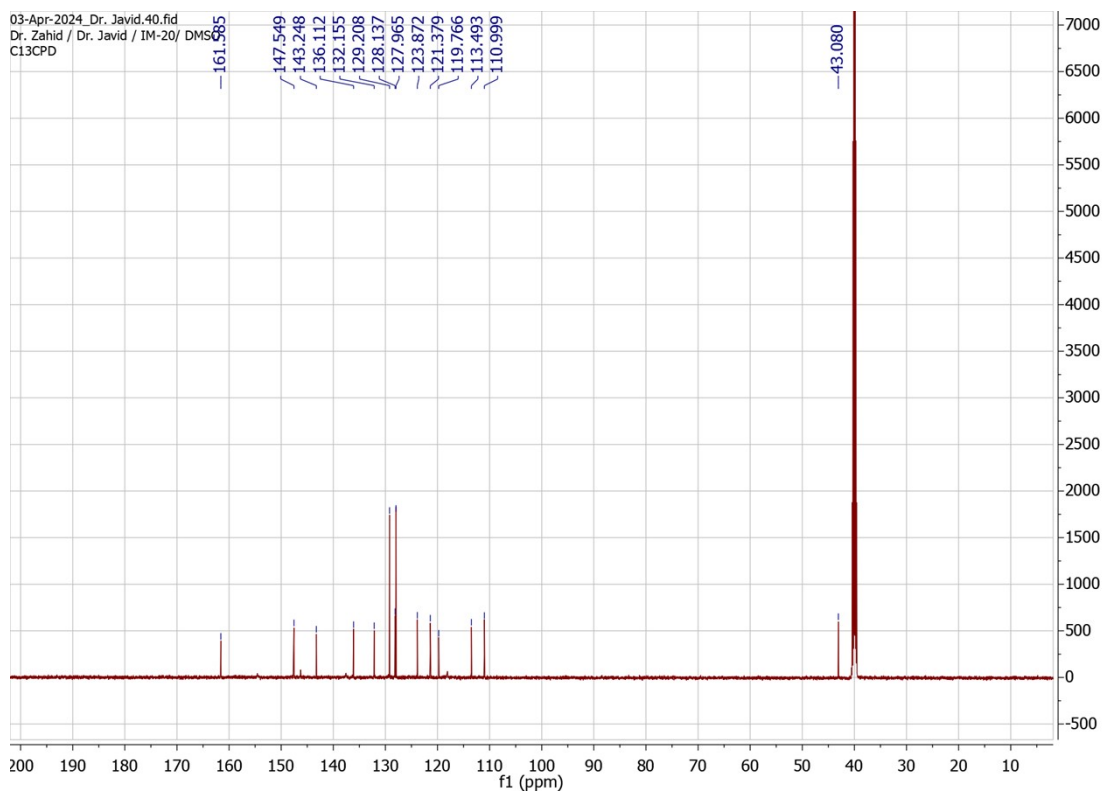

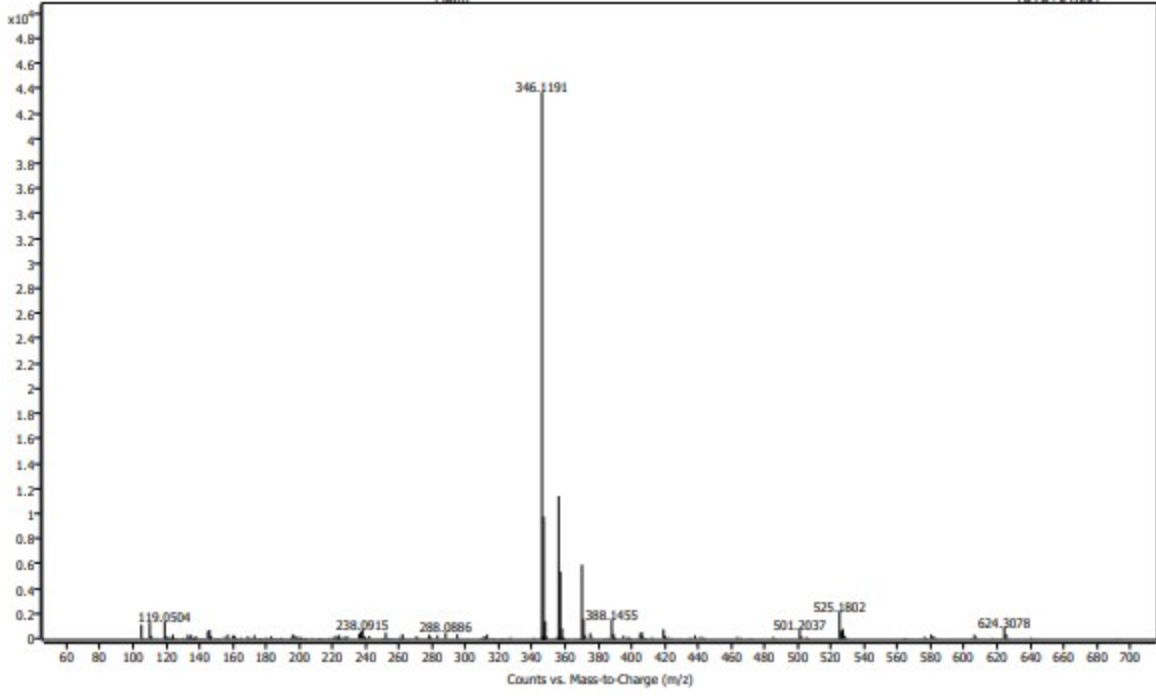



# <sup>1</sup>H NMR, <sup>13</sup>C NMR, and mass spectra of compound 17

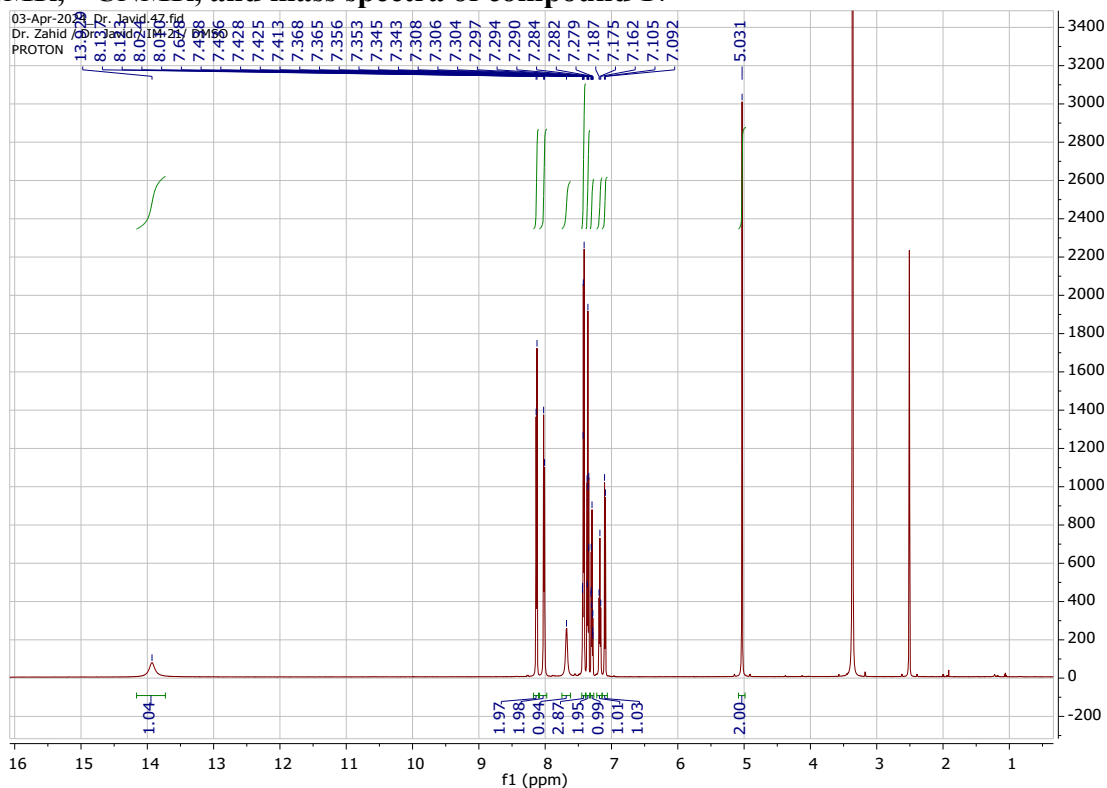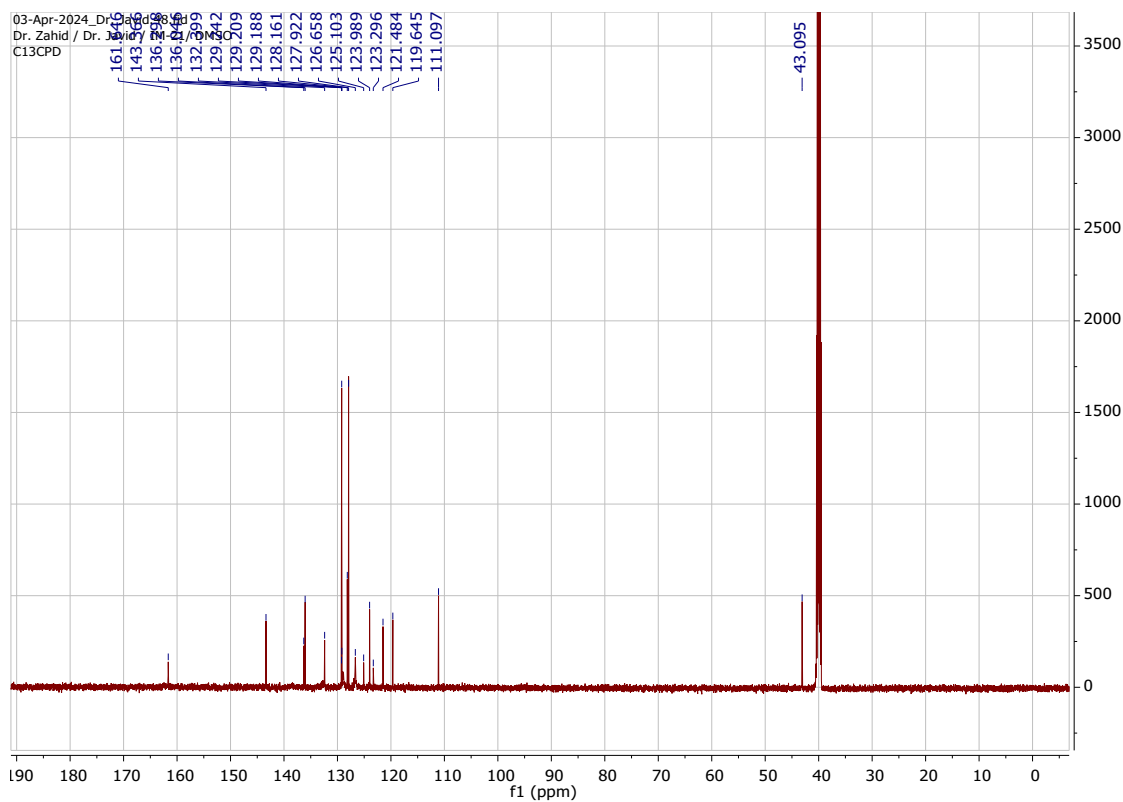

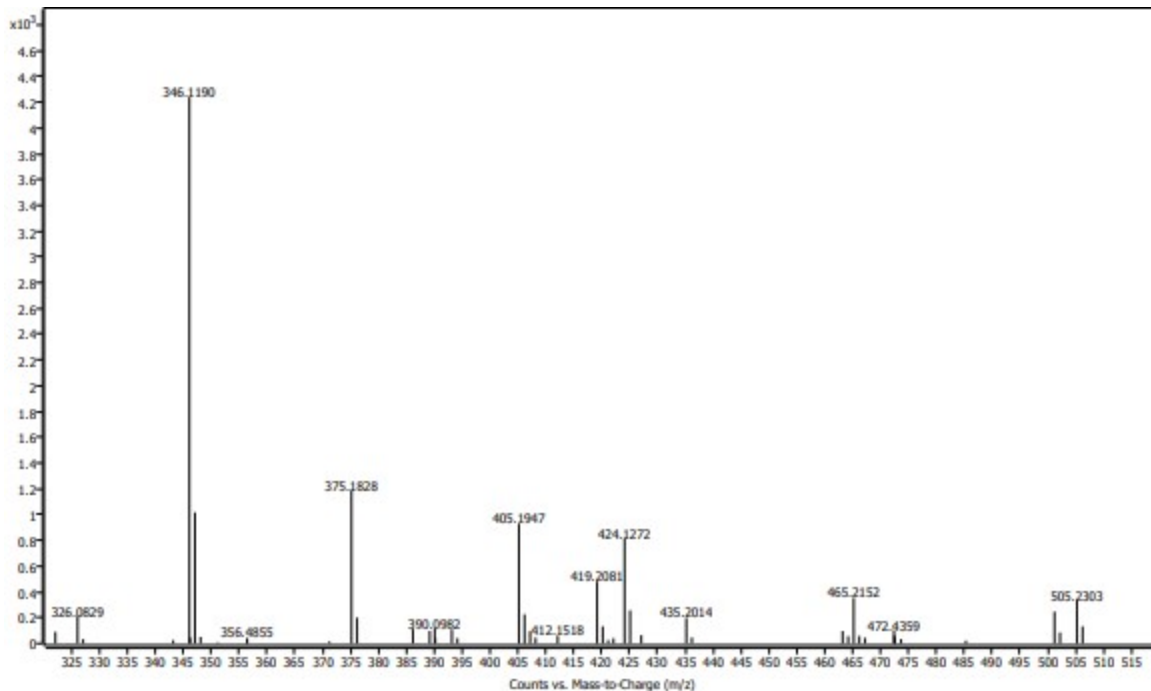

# <sup>1</sup>H NMR, <sup>13</sup>C NMR, and mass spectra of compound 18

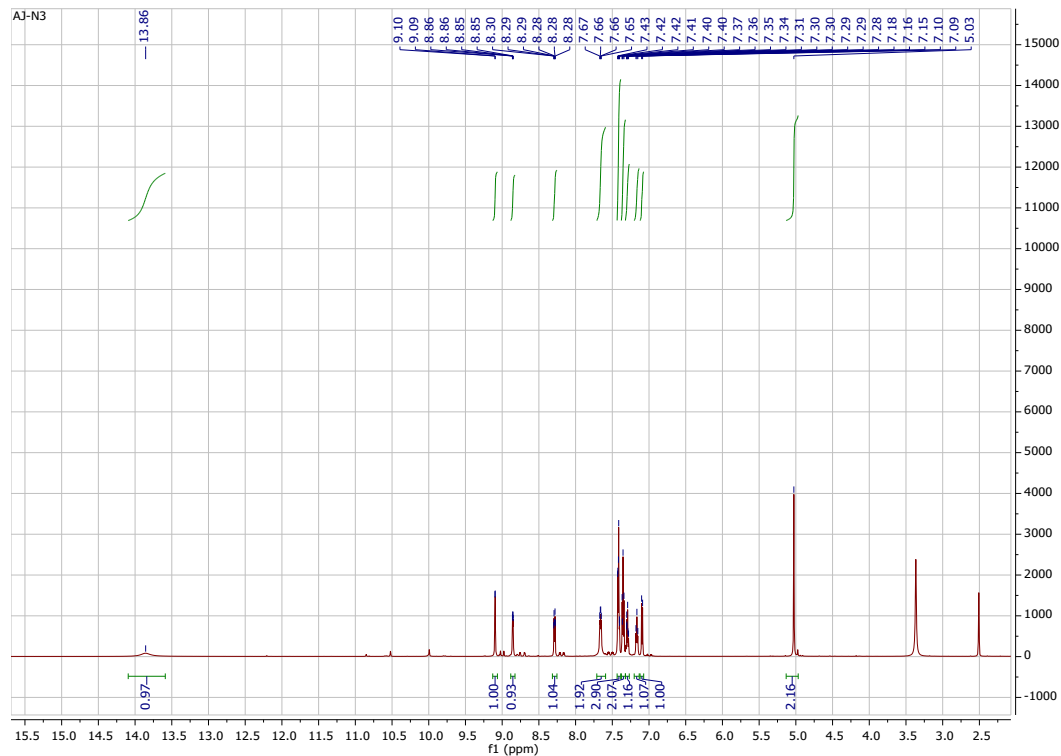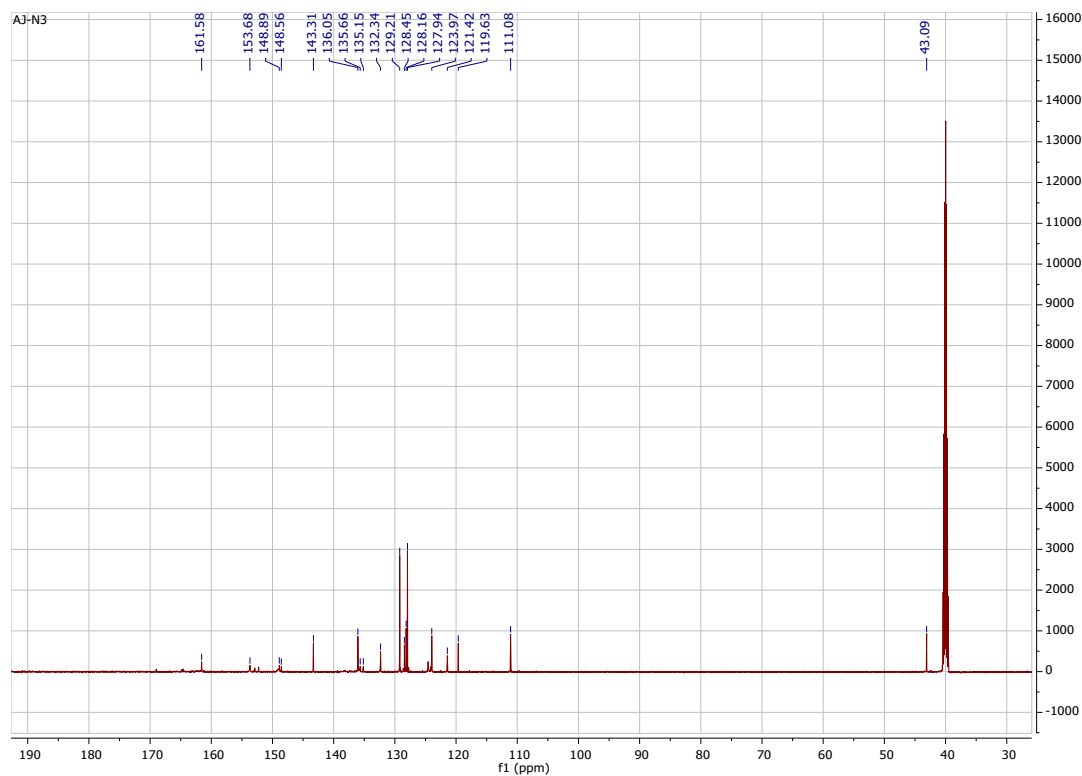

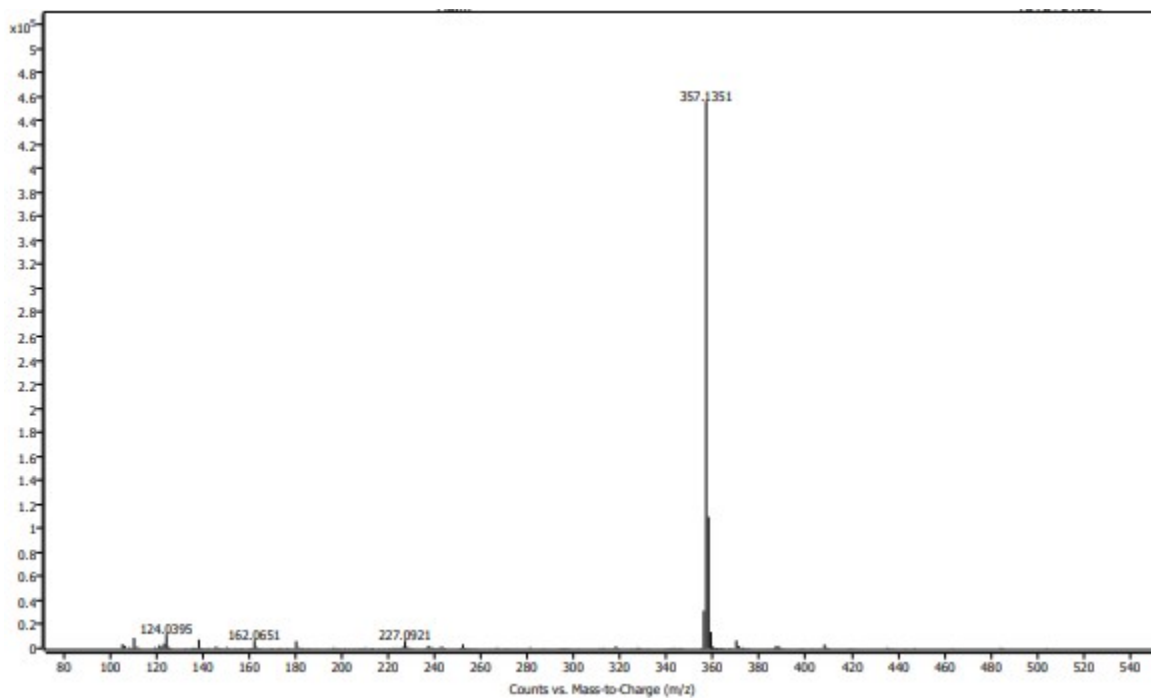

# <sup>1</sup>H NMR, <sup>13</sup>C NMR, and mass spectra of compound 19

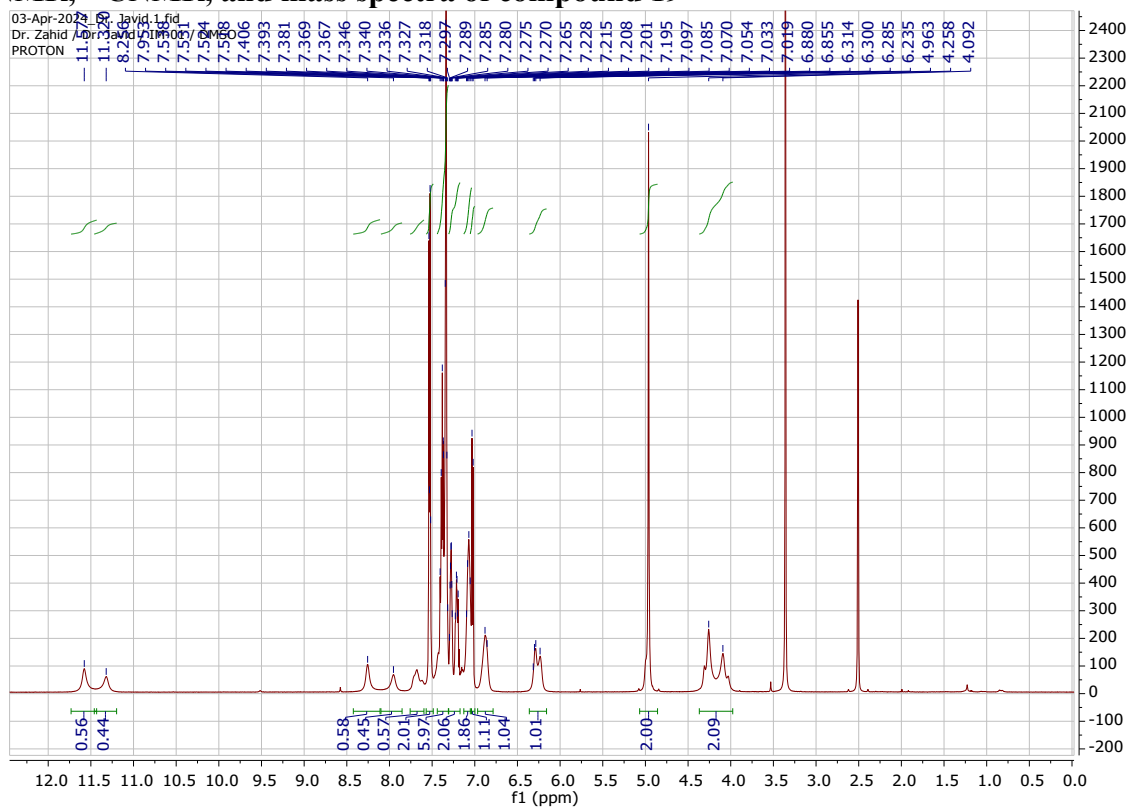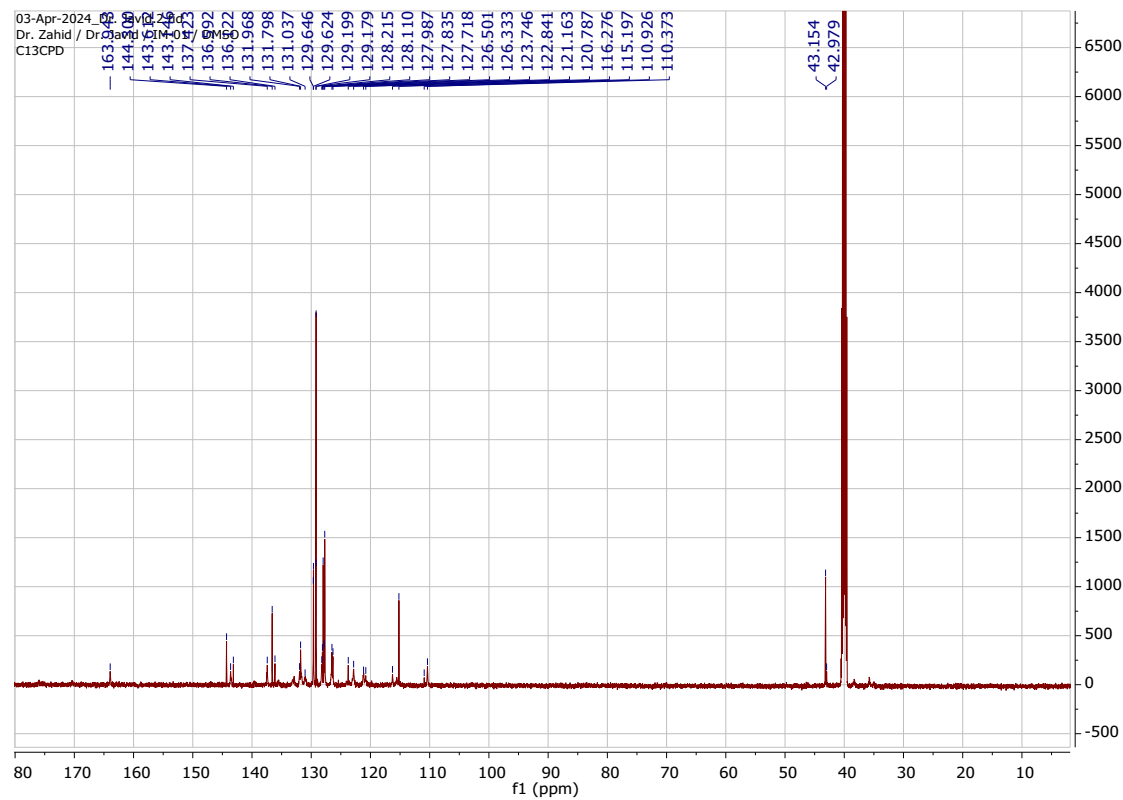

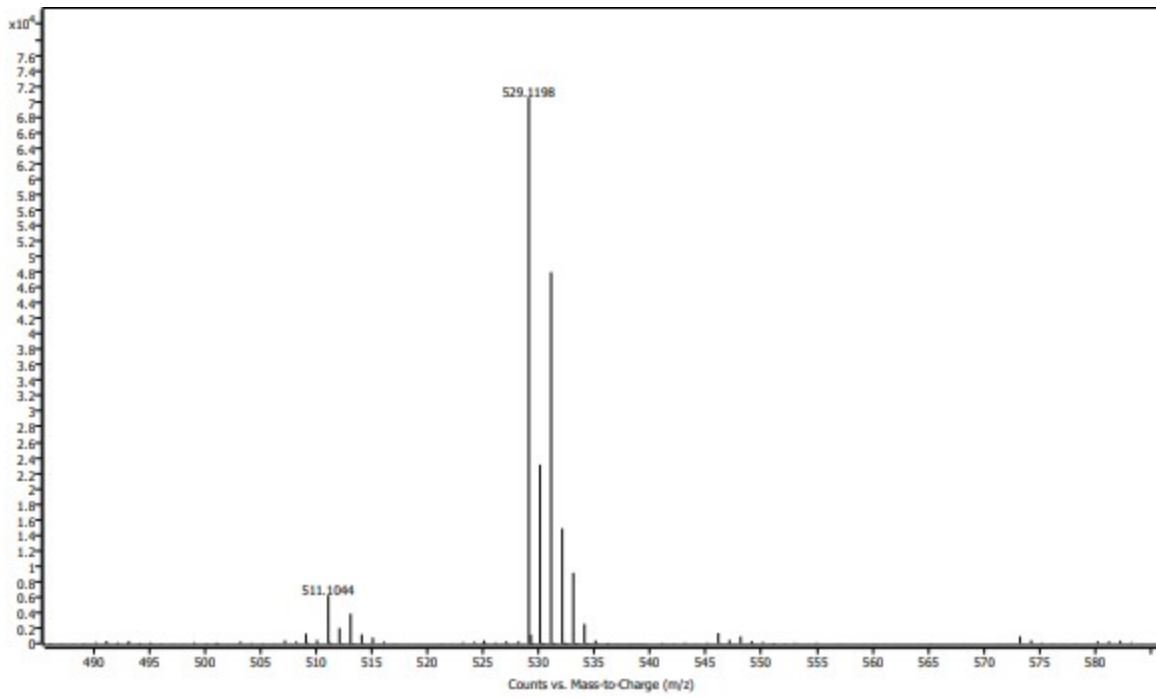

# <sup>1</sup>H NMR, <sup>13</sup>C NMR, and mass spectra of compound 20

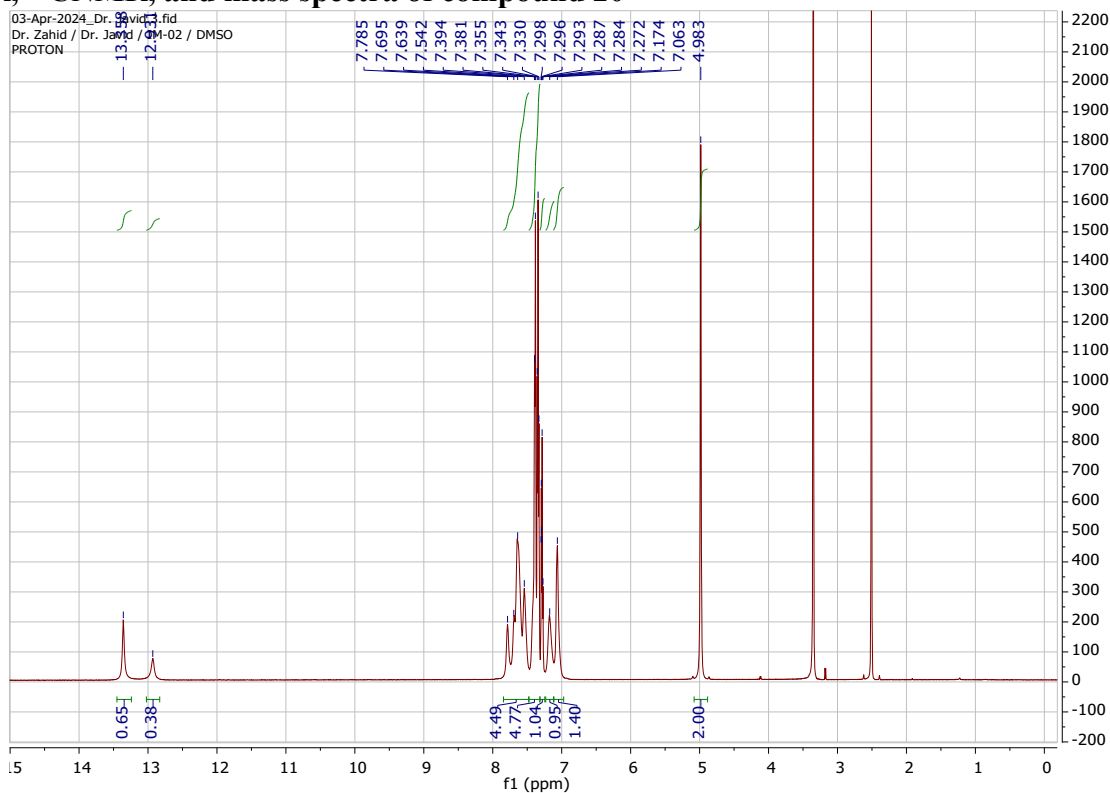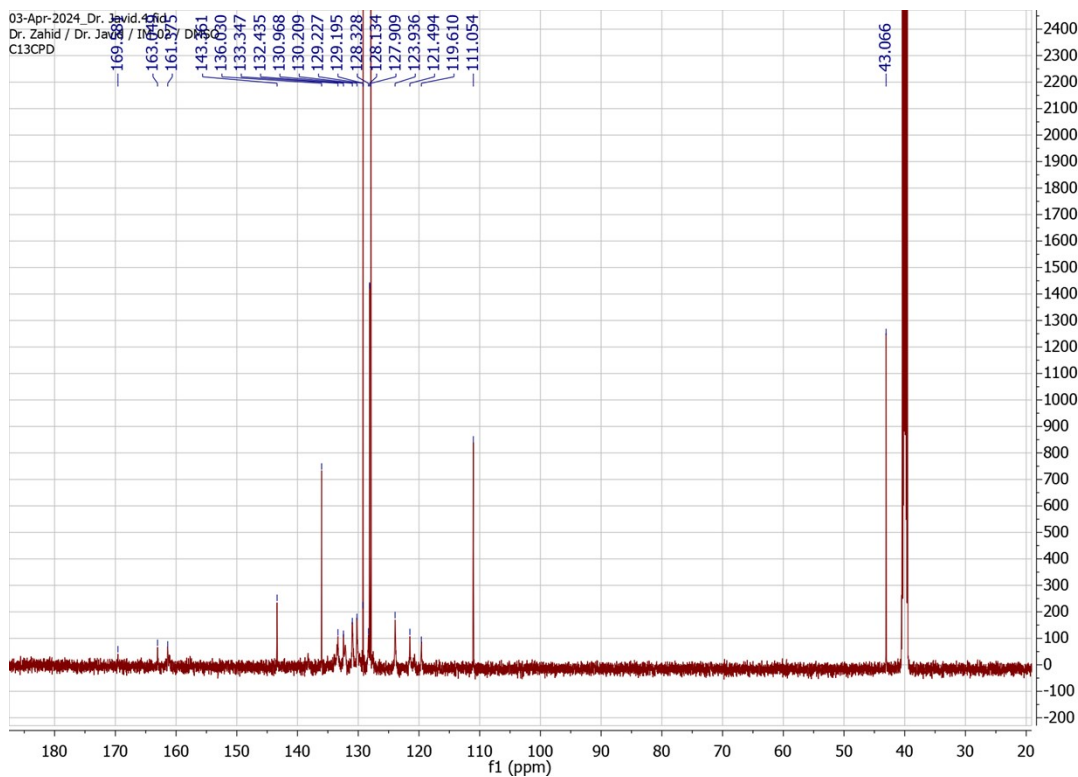

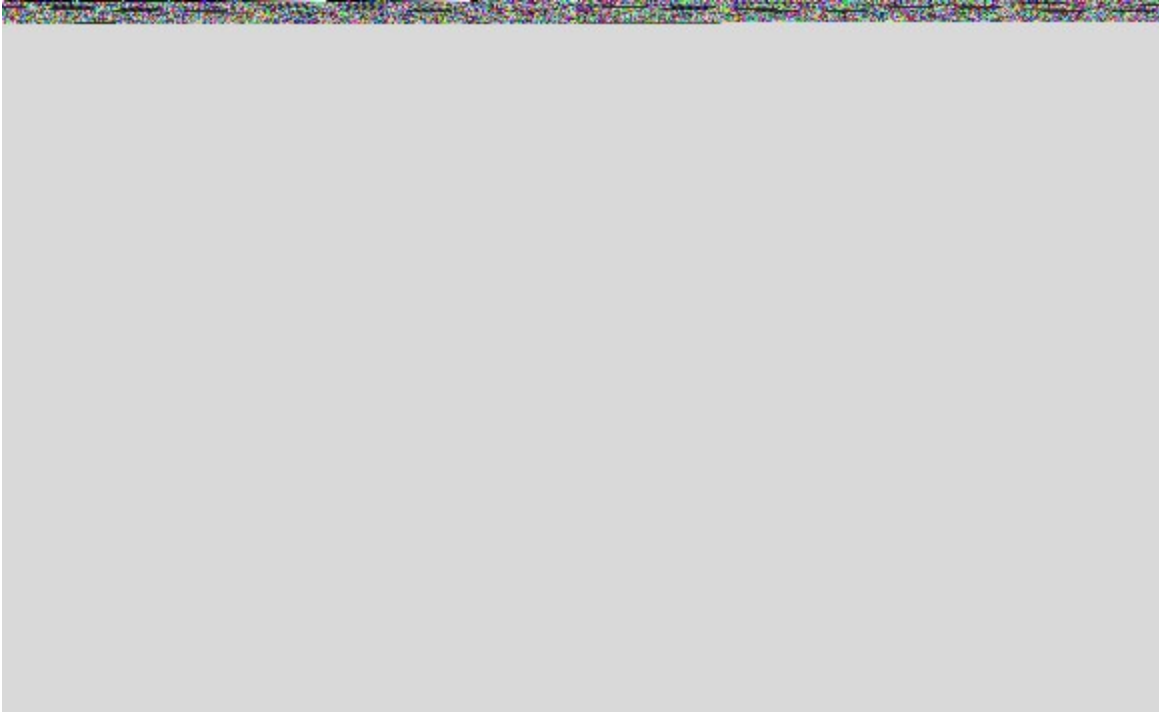



# <sup>1</sup>H NMR, <sup>13</sup>C NMR, and mass spectra of compound 21

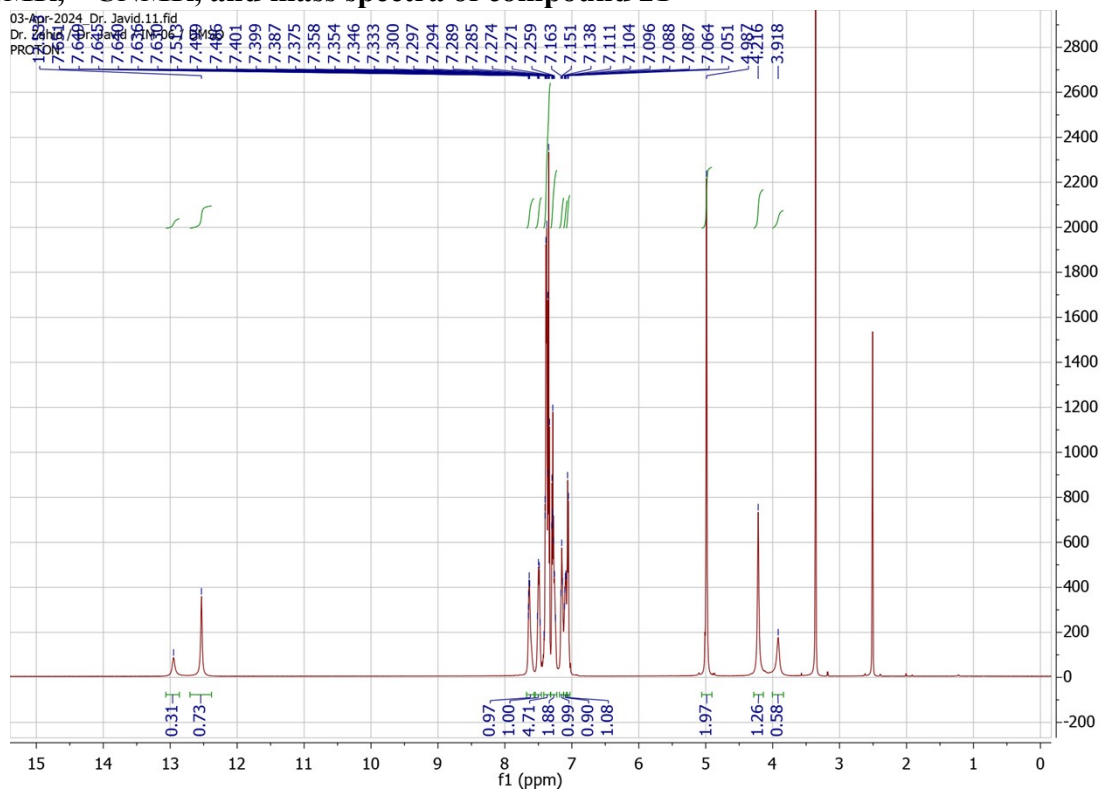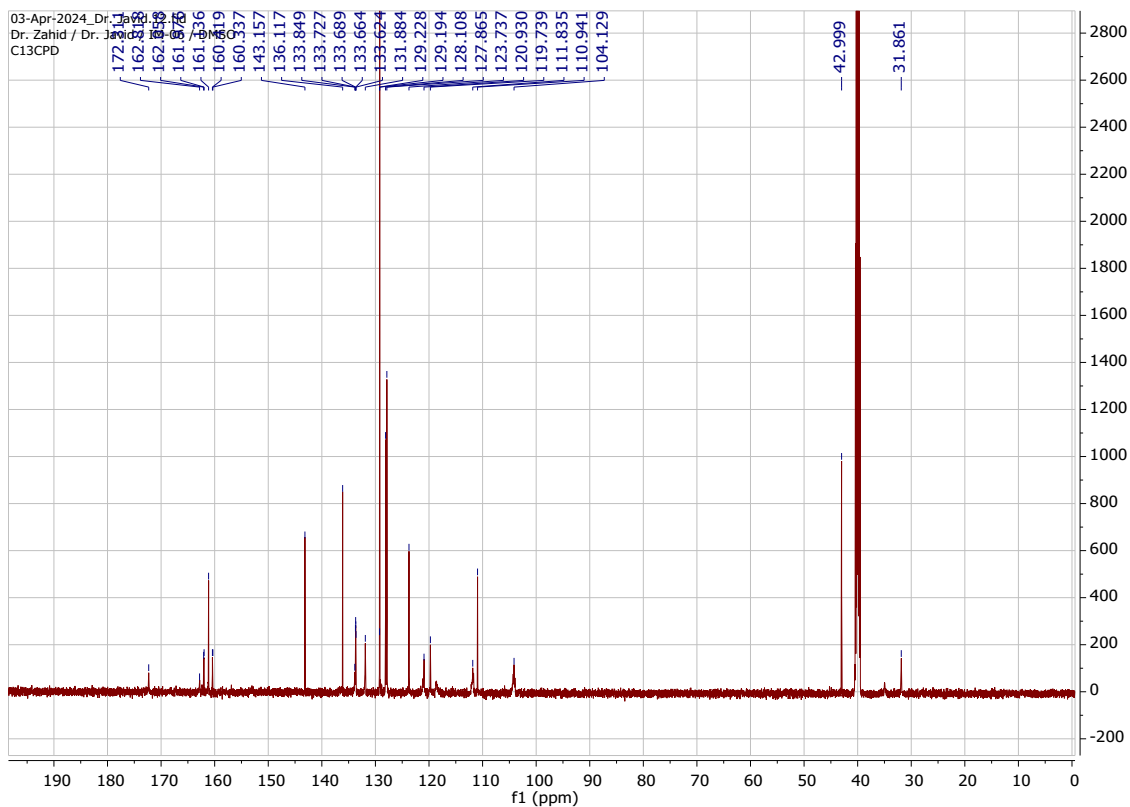

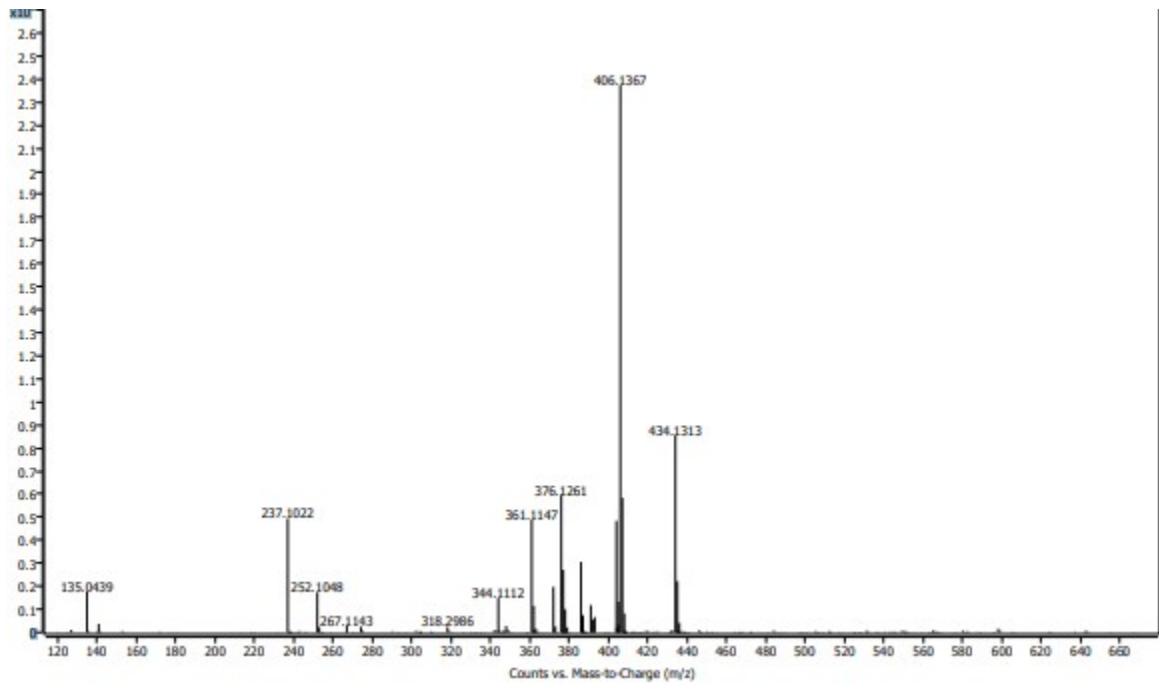

# <sup>1</sup>HNMR, <sup>13</sup>CNMR, and mass spectra of compound 22

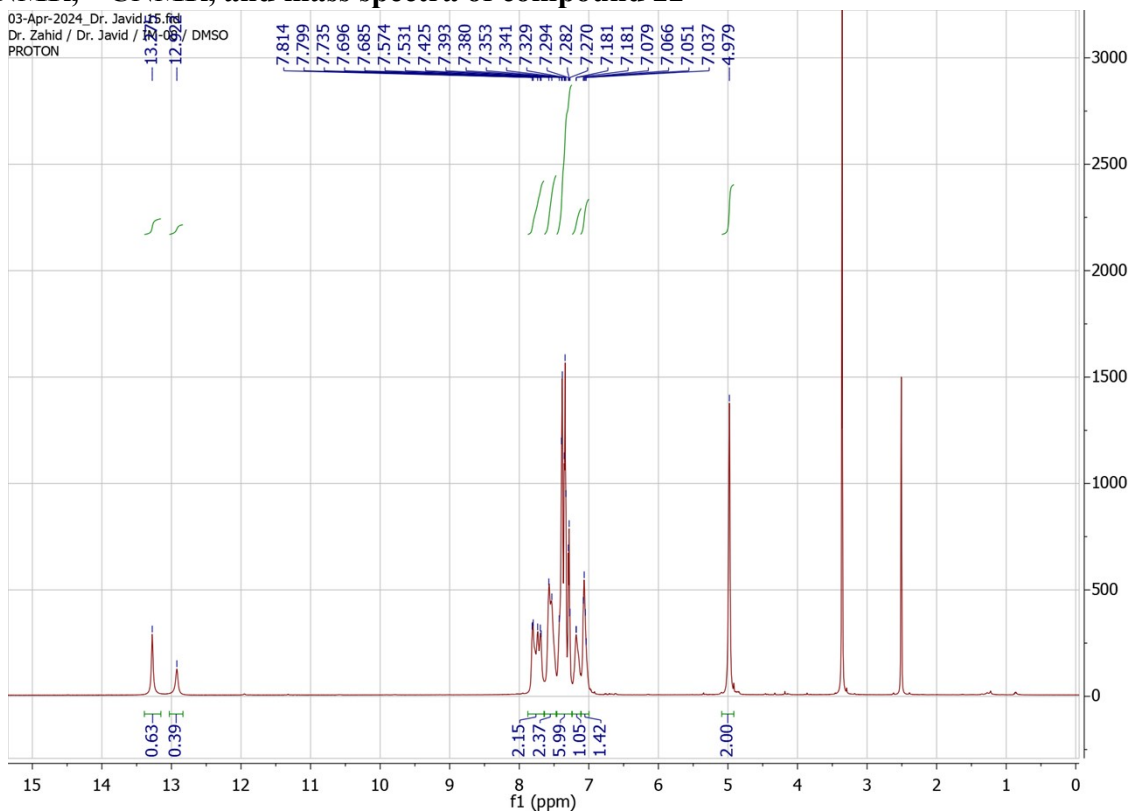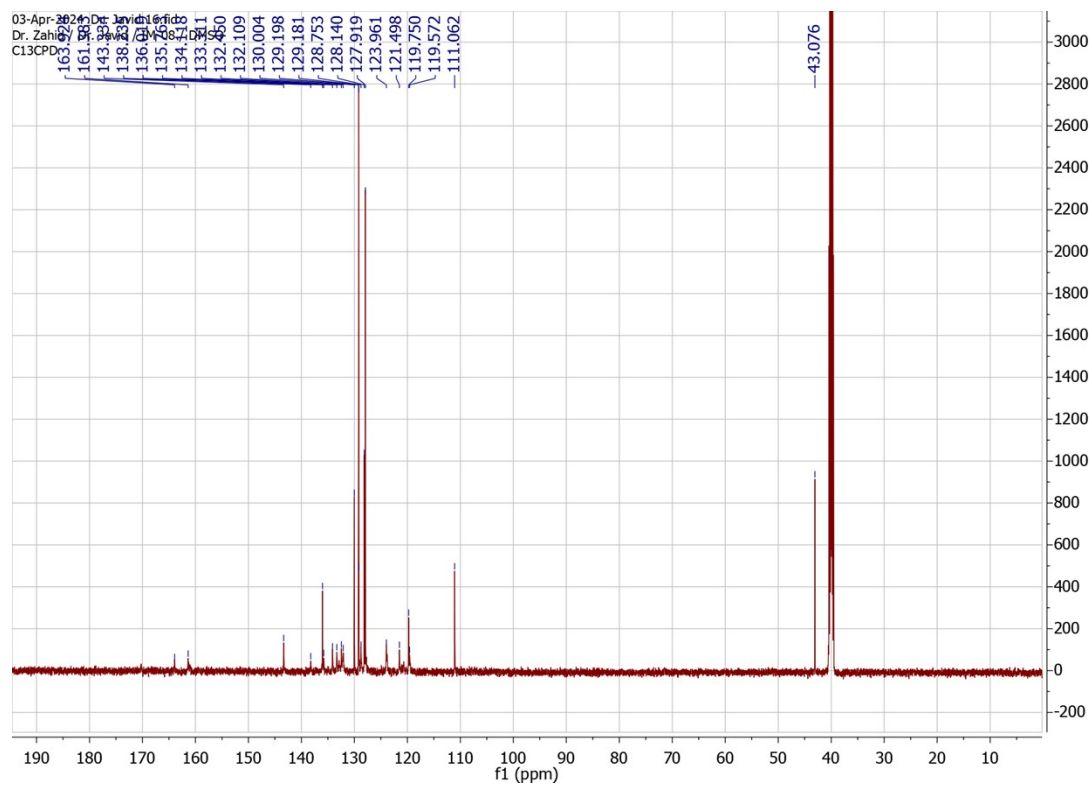

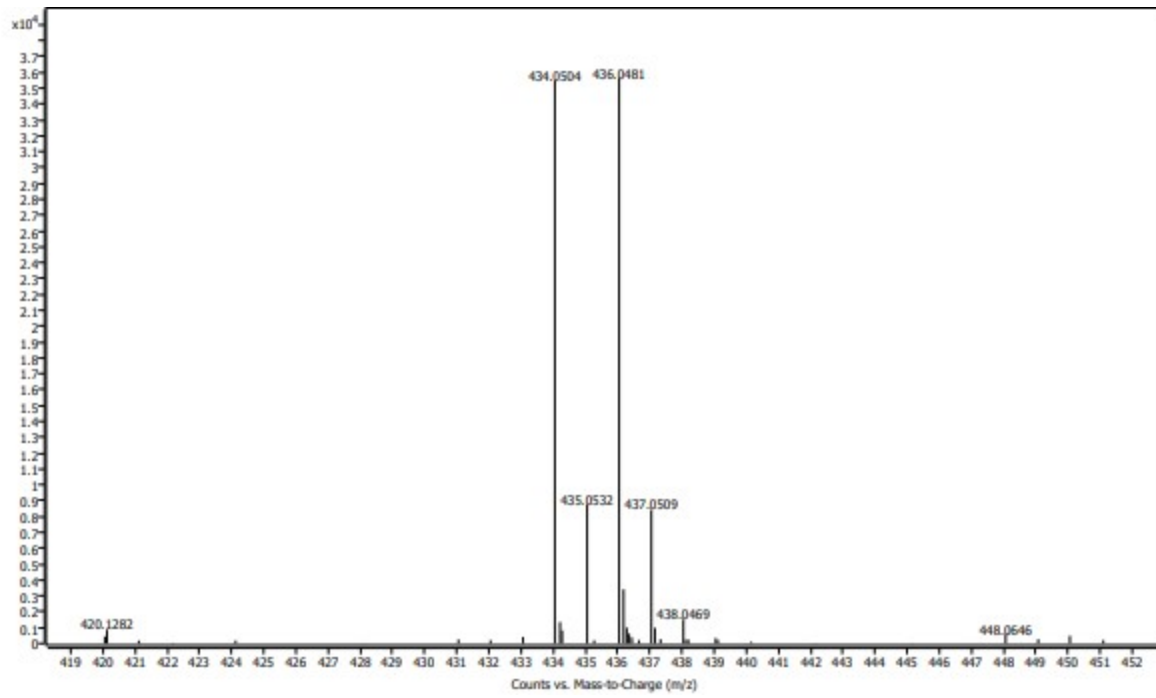

# <sup>1</sup>H NMR, <sup>13</sup>C NMR, and mass spectra of compound 23

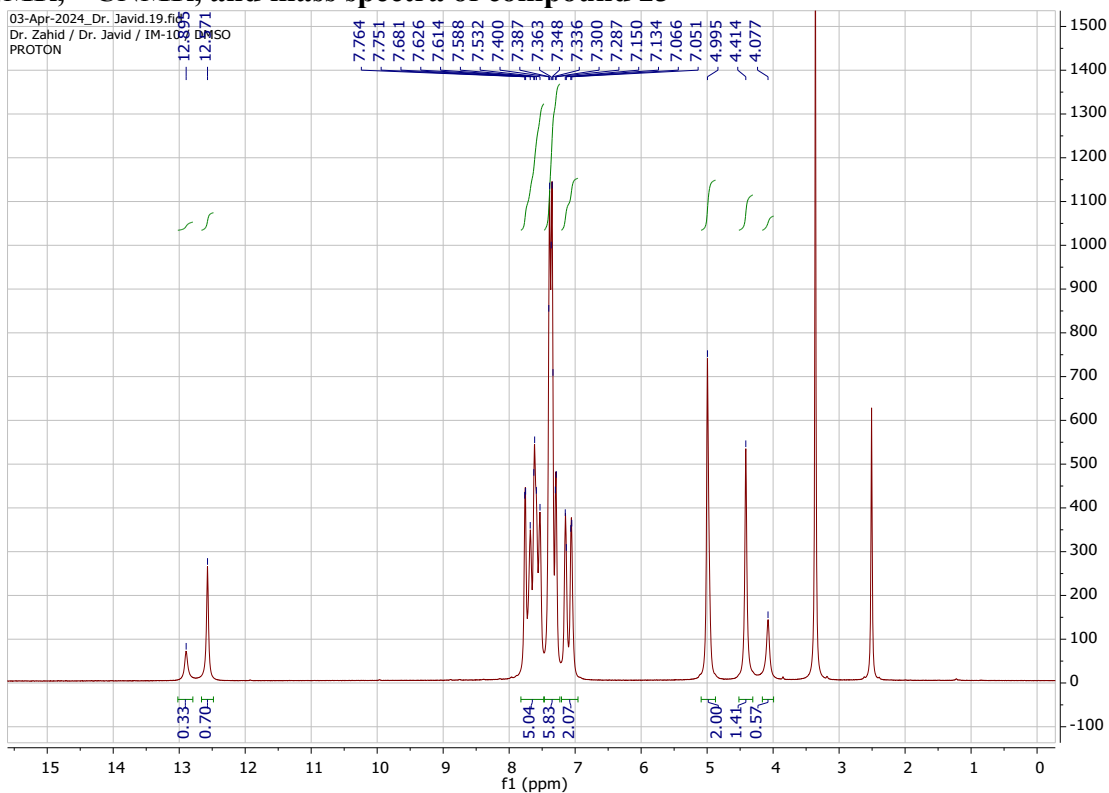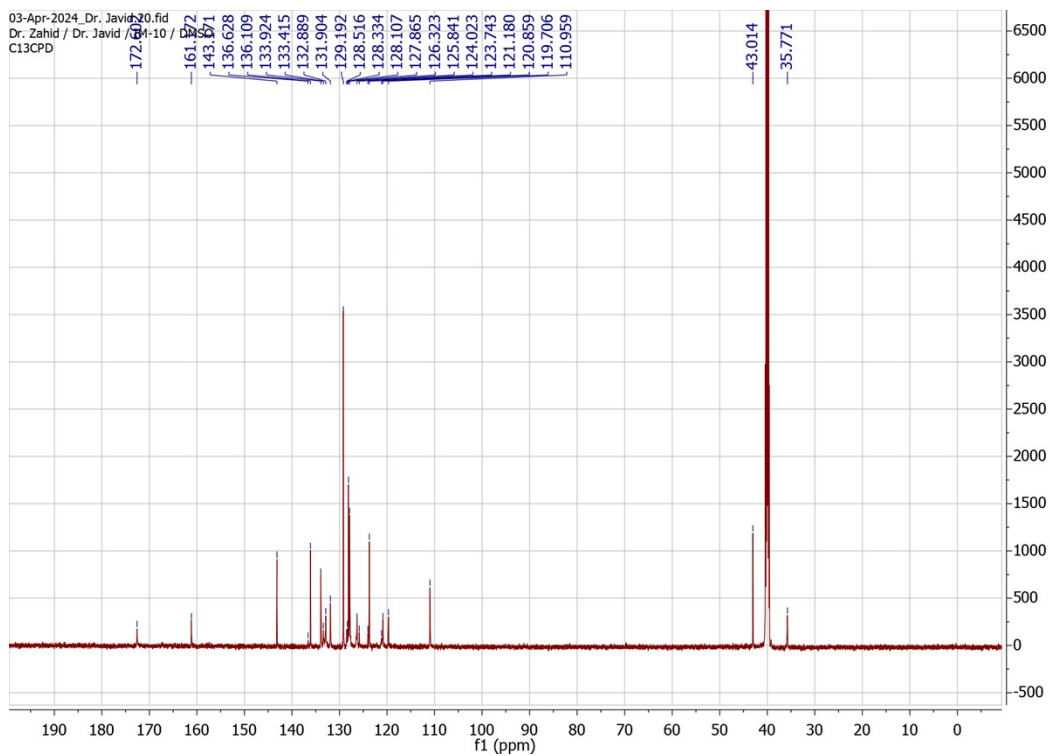

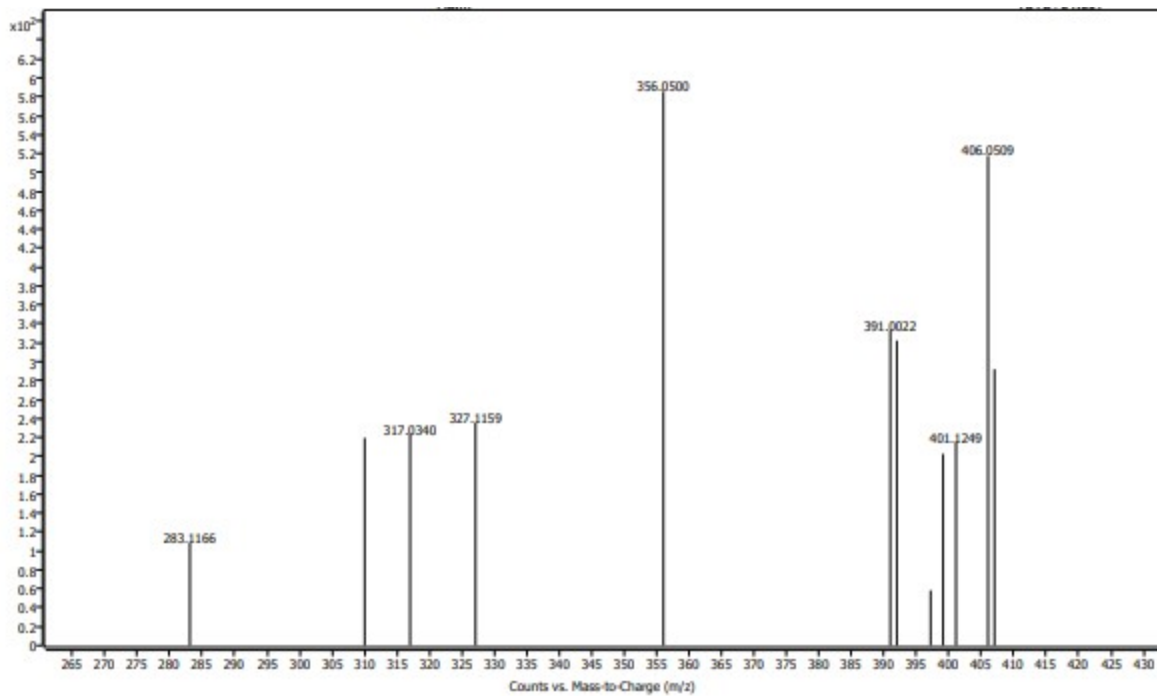

# <sup>1</sup>H NMR, <sup>13</sup>C NMR, and mass spectra of compound 24

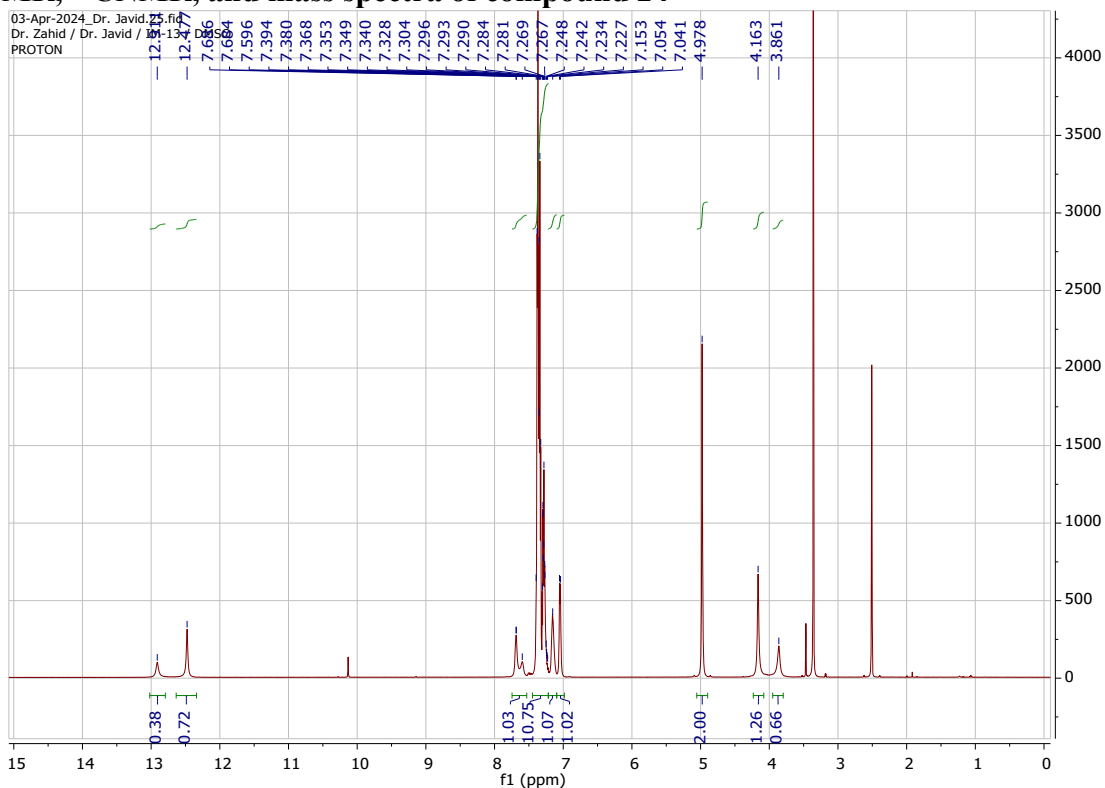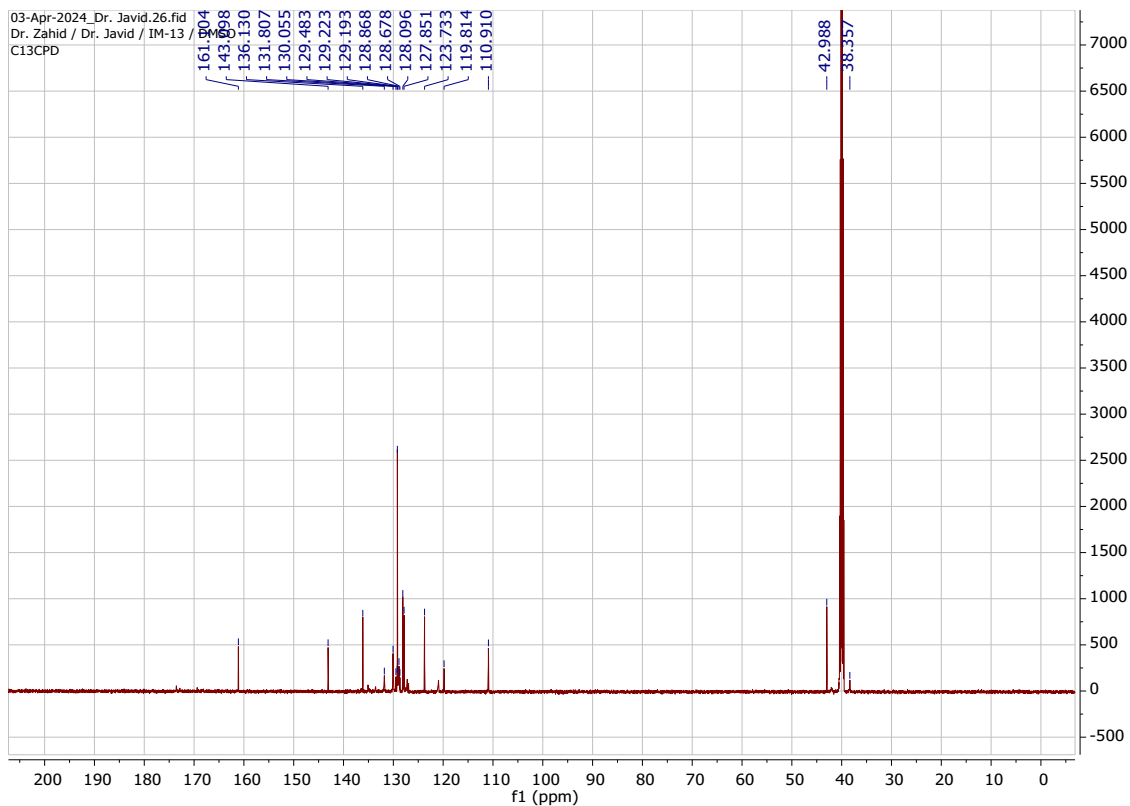

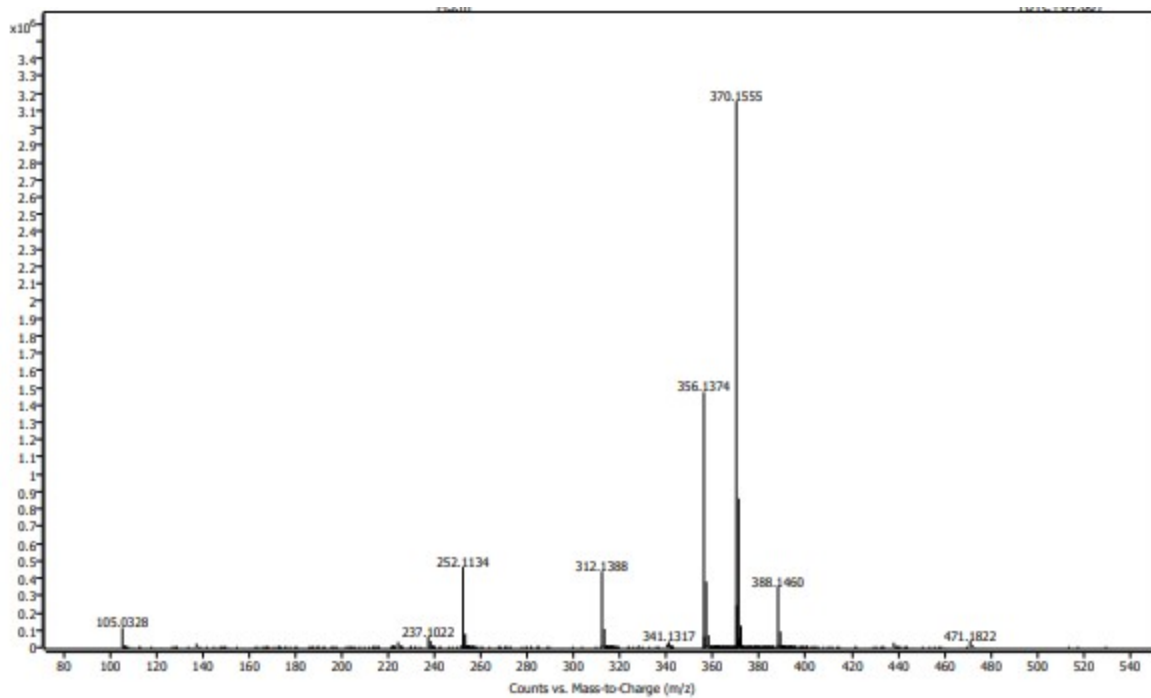



# <sup>1</sup>H NMR, <sup>13</sup>C NMR, and mass spectra of compound 25

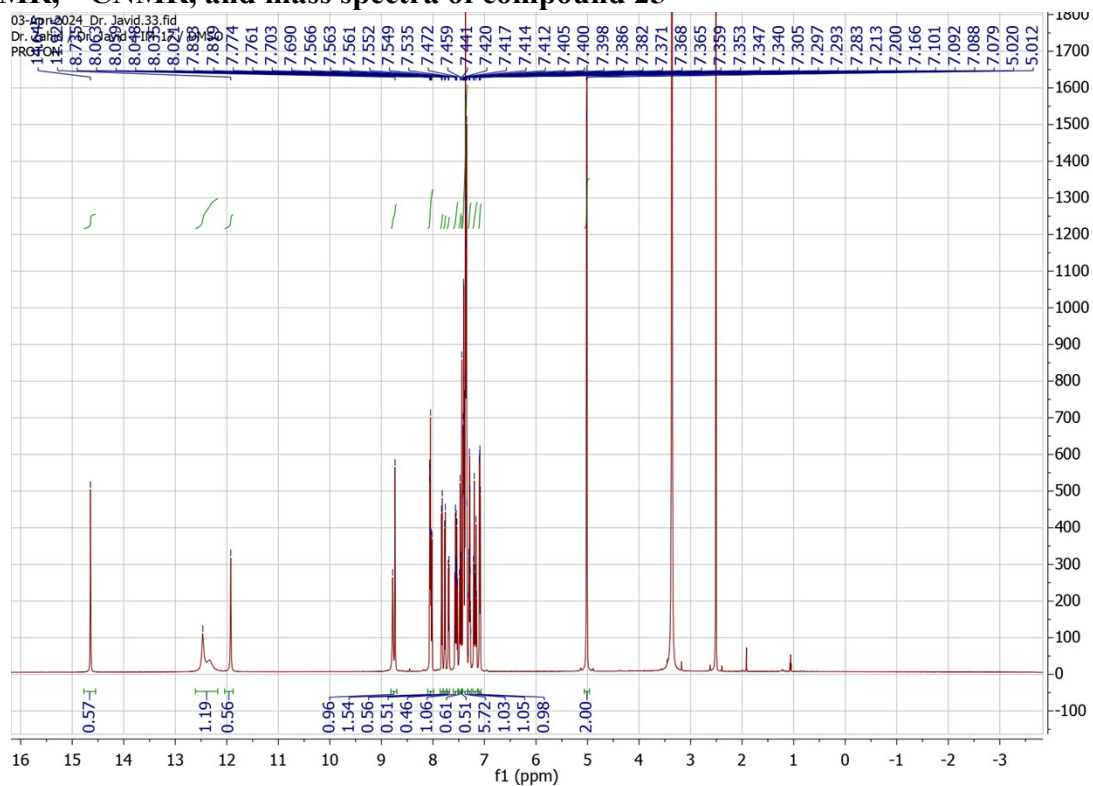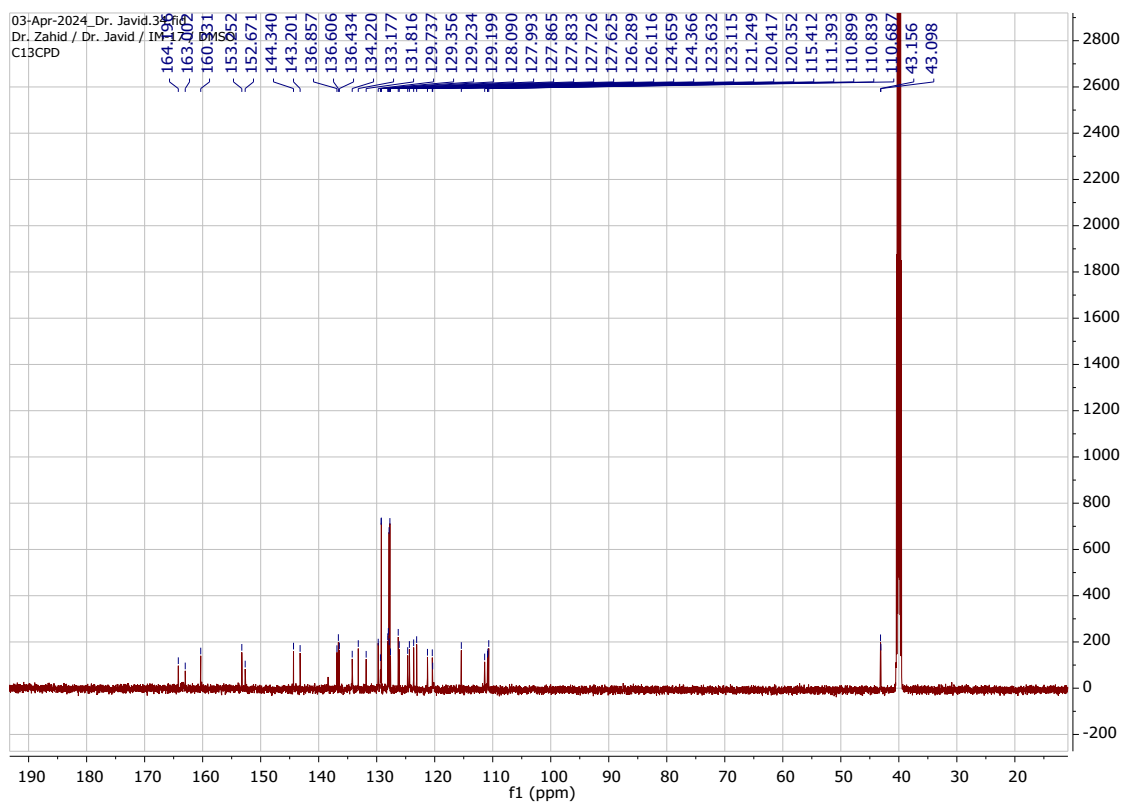

|              |         |                |                           |            |                 |                                     |
|--------------|---------|----------------|---------------------------|------------|-----------------|-------------------------------------|
| Sample Name  | IM-17   | Rack Position  |                           | Instrument | Instrument 1    | Acq Operator                        |
| Inj Vol (ul) | 3       | Plate Position |                           | IRM Status | All ions missed |                                     |
| Data File    | IM-17.d | Acq Method     | APCI POS ION DMSO<br>MS.m | Comment    |                 | Acq Time (Local)                    |
|              |         |                |                           |            |                 | 23-Sep-24 2:08:36 PM<br>(UTC+04:00) |

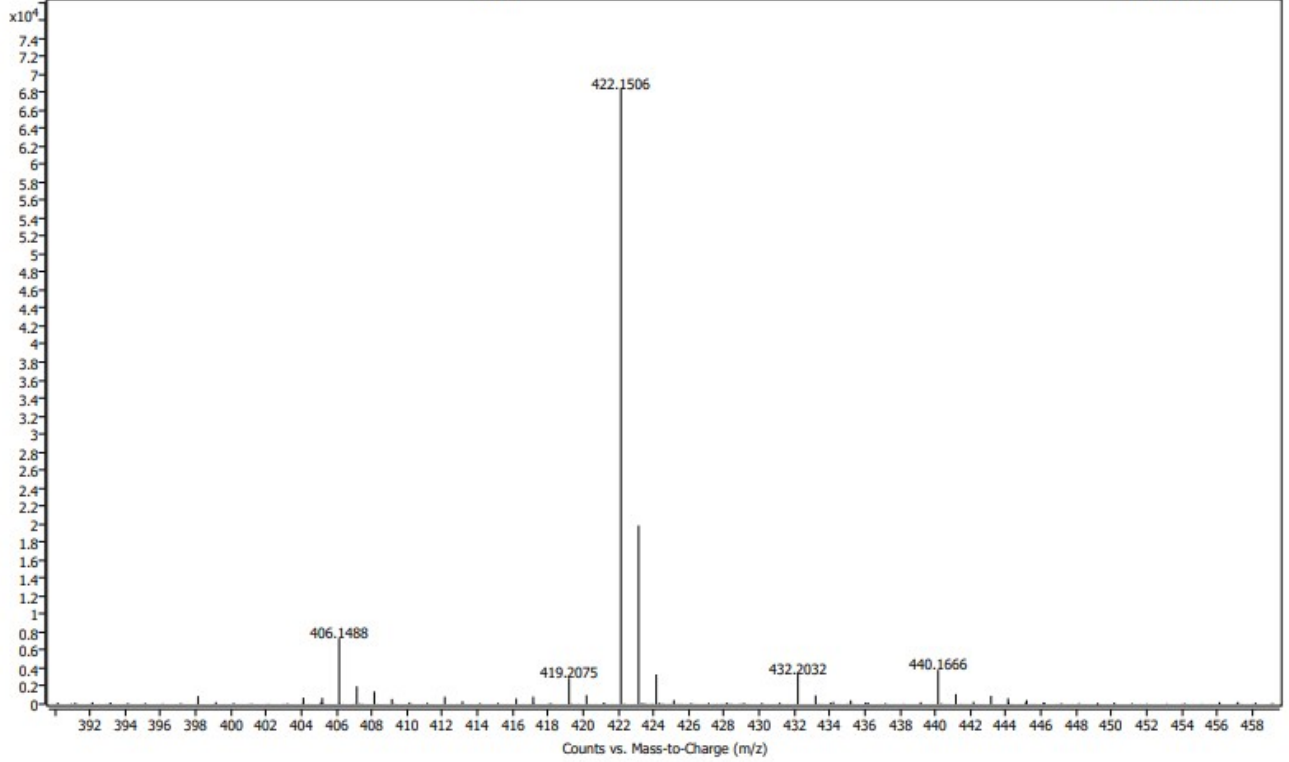

Supplement: RA-015-D4RA07650H-s001.pdf [file RA-015-D4RA07650H-s001.pdf]
